# Supplementary material
Source: publisher figshare collection journal article supplement (https://sage.figshare.com/ndownloader/files/15352718)
Supplement: Supplementary file 1 [file 15352718]

## Sheet: Table S1
Table S1. Information of recruited healthy human subjects
	Gender
	Male	Female
Number of samples	15	15
Median age	32	32
Age range	25-35	25-35
Median body weight (kg)	63.6	53.8
Body weight (kg) range	53.0-72.1	44.4-73.4
Median body height (cm)	171	161.6
Body height (cm) range	165.3-180.4	151.0-174.7
Median BMI	22	20.3
BMI range	18.5-23.5	18.6-25.0

## Sheet: Table S2
Table S2. List of standards used in the present study
Metabolite name	HMDB ID	Provider	Detection limit (loading amount on column)	Retention time$ (min)
1,3-Dimethyluric acid	HMDB0001857	Sigma	25 fmol	10.563
1,7-Dimethyluric acid	HMDB0011103	Funakoshi	25 fmol	17.471
1-Deoxy-D-glucitol	HMDB0041500	Santa Cruz Biotechnology	25 fmol	3.142
1-Methyluric acid	HMDB0003099	Sigma	25 fmol	18.032
2,3-Dihydroxybutanedioic acid	HMDB0059916	Sigma	50 fmol	8.928
2,3-Pyridinedicarboxylic acid	HMDB0000232	Sigma	25 fmol	10.655
2,6-Pyridinedicarboxylic acid	HMDB0033161	Sigma	25 fmol	15.299
2-Deoxyribose	HMDB0003224	Wako	2.5 nmol	4.004
2-Furoic acid	HMDB0000617	Sigma	50 fmol	7.429
2-Hydroxy-2-methylbutyric acid	HMDB0001987	Sigma	50 fmol	4.123
2-Hydroxyglutaric acid	HMDB0000694	Abcam	250 fmol	8.269
2-Isopropylmalic acid	HMDB0000402	Sigma	5 fmol	9.625
2-Ketoglutaric acid	HMDB0000208	Wako	25 fmol	10.143
2-Pyrocatechuic acid	HMDB0000397	Tokyo Chemical Industry	25 fmol	28.081
3,3-Dimethylglutaric acid	HMDB0002441	Nacalai Tesque	25 fmol	8.133
3,3'-Thiobispropanoic acid	HMDB0031162	Tokyo Chemical Industry	50 fmol	9.089
3,7-Dimethyluric acid	HMDB0001982	Sigma	25 fmol	13.239
3-Carboxy-4-methyl-5-propyl-2-furanpropionic acid	HMDB0061112	Cayman Chemical	50 fmol	27.53
3-Hydroxy-3-methylglutaric acid	HMDB0000355	Sigma	25 fmol	8.081
3-Hydroxybutyric acid	HMDB0000357	Sigma	250 fmol	3.82
3-Methoxybenzoic acid	HMDB0032606	Tokyo Chemical Industry	250 fmol	16.598
3-Methoxysalicylic acid	HMDB0059713	Tokyo Chemical Industry	5 fmol	28.579
3-Methyladipic acid	HMDB0000555	Sigma	25 fmol	8.474
3-Methylglutaric acid	HMDB0000752	Sigma	50 fmol	8.286a
4-Hydroxycinnamic acid	HMDB0002035	Sigma	25 fmol	21.692
5,6-Dihydrouridine	HMDB0000497	SynQuesr Laboratories	250 fmol	4.53
5-Hydroxyindole-3-acetic acid	HMDB0000763	Funakoshi	50 fmol	23.397
Acetoacetyl-CoA	HMDB0001484	Sigma	250 fmol	29.567
Acetyl-CoA	HMDB0001206	Kanto Chemical	N/A	N.D.
Acrylic acid	HMDB0031647	Tokyo Chemical Industry	2.5 pmol	4.784
Adenosine 5'-diphosphate	HMDB0001341	Sigma	250 fmol	17.467
Adenosine diphosphate ribose	HMDB0001178	Sigma	250 fmol	15.892
Adenosine monophosphate	HMDB0000045	Sigma	250 fmol	11.237
Adenosine triphosphate	HMDB0000538	Cosmo Bio	50 fmol	22.07
Adenylsuccinic acid	HMDB0000536	Tokyo Chemical Industry	50 fmol	20.973
Adipic acid	HMDB0000448	Sigma	50 fmol	8.286a
Allantoin	HMDB0000462	Sigma	50 fmol	4.465
Alpha-Lactose	HMDB0000186	Sigma	50 fmol	3.178b
Ascorbic acid	HMDB0000044	Sigma	50 fmol	9.507c
Aspartic acid	HMDB0000191	Wako	25 fmol	8.085
Aspartyl-Threonine	HMDB0028763	Cosmo Bio	2.5 pmol	7.223
Biotin	HMDB0000030	Sigma	25 fmol	5.922
Caproic acid	HMDB0000535	Sigma	2.5 pmol	7.767
Carnosine	HMDB0000033	Wako	N/A	N.D.
cis-Aconitic acid	HMDB0000072	Sigma	5 fmol	15.442
Citraconic acid	HMDB0000634	Tokyo Chemical Industry	25 fmol	9.272d
Citric acid	HMDB0000094	Wako	5 fmol	14.193
Coenzyme A	HMDB0001423	Cosmo Bio	50 fmol	22.863
Cyclic AMP	HMDB0000058	Wako	25 fmol	12.251
Cyclic GMP	HMDB0001314	Sigma	50 fmol	21.062
Cysteine	HMDB0000574	Wako	N/A	N.D.
Cytidine 5'-diphosphate	HMDB0001546	Cosmo Bio	500 fmol	14.052
Cytidine monophosphate	HMDB0000095	Sigma	250 fmol	8.514
D-Arabinose	HMDB0029942	Tokyo Chemical Industry	250 fmol	3.442e
D-Arabitol	HMDB0000568	Tokyo Chemical Industry	25 fmol	3.126f
Dehydroacetic acid	N/A	Sigma	2.5 pmol	11.151
Deoxycytidine 5'-triphosphate	HMDB0000998	Abcam	50 fmol	17.771
D-Fructose	HMDB0000660	Wako	250 fmol	3.356g
D-Galactose	HMDB0000143	Nacalai Tesque	250 fmol	3.356g
D-Glucose	HMDB0000122	Sigma	250 fmol	3.356g
D-Glyceraldehyde 3-phosphate	HMDB0001112	Sigma	5 pmol	9.185
Dihydrouracil	HMDB0000076	Sigma	2.5 pmol	4.188
Dihydroxyacetone phosphate	HMDB0001473	Sigma	N/A	N.D.
D-Maltose	HMDB0000163	Sigma	50 fmol	3.178b
D-Ribose	HMDB0000283	Sigma	250 fmol	3.442e
D-Ribose 5-phosphate	HMDB0001548	Sigma	25 fmol	10.541
D-Sedoheptulose 7-phosphate	HMDB0001068	Funakoshi	250 fmol	10.668
D-Xylitol	HMDB0002917	Sigma	25 fmol	3.126f
D-Xylose	HMDB0000098	Sigma	250 fmol	3.442e
D-Xylulose	HMDB0001644	Sigma	250 fmol	3.442e
Epinephrine	HMDB0000068	Sigma	2.5 pmol	23.055
Ethoxyacetic acid	HMDB0031212	Sigma	250 fmol	3.915
Ethylmalonic acid	HMDB0000622	Wako	50 fmol	8.949
Fumaric acid	HMDB0000134	Wako	50 fmol	10.819
Galactitol	HMDB0000107	Sigma	5 fmol	3.142h
Gentisic acid	HMDB0000152	Wako	25 fmol	28.584
Gluconic acid	HMDB0000625	Wako	2.5 fmol	3.766i
Gluconolactone	HMDB0000150	Sigma	2.5 fmol	3.766i
Glucose 6-phosphate	HMDB0001401	Sigma	50 fmol	9.732
Glutamic acid	HMDB0000148	Wako	250 fmol	7.836
Glutamylglutamic acid	HMDB0028818	Peptide Institute	2500 fmol	11.965
Glutaric acid	HMDB0000661	Sigma	250 fmol	8.223j
Glutathione	HMDB0000125	Wako	500 fmol	12.73
Glyceric acid	HMDB0000139	Tokyo Chemical Industry	50 fmol	3.843
Glycerol	HMDB0000131	Sigma	2.5 pmol	3.2
Glycerol 3-phosphate	HMDB0000126	Sigma	25 fmol	7.104
Glycolic acid	HMDB0000115	Wako	25 pmol	3.995
Hippuric acid	HMDB0000714	Sigma	5 fmol	9.006
Homocysteinesulfinic acid	HMDB0006462	Toronto Research Chemicals	50 fmol	7.475
Homotaurine	N/A	Sigma	25 fmol	4.04
Homovanillic acid	HMDB0000118	Sigma	25 fmol	14.395
Homovanillic acid sulfate	HMDB0011719	Toronto Research Chemicals	25 fmol	27.806
Hydroxyphenylacetylglycine	HMDB0000735	Toronto Research Chemicals	25 fmol	13.731
Hydroxyphenyllactic acid	HMDB0000755	Sigma	5 fmol	13.737
Indole-3-acetic acid	HMDB0000197	Sigma	50 fmol	24.509
Indole-3-carboxylic acid	HMDB0003320	Sigma	250 fmol	25.158
Indole-3-lactic acid	HMDB0000671	Tokyo Chemical Industry	25 fmol	23.224
Isethionic acid	HMDB0003903	Sigma	25 fmol	4.721
Isocitric acid	HMDB0000193	Sigma	25 fmol	14.856
Isophthalic acid	N/A	Sigma	2.5 pmol	19.274
Itaconic acid	HMDB0002092	Sigma	25 fmol	9.272d
Lactic acid	HMDB0000190	Sigma	25 pmol	3.873
L-Arabinose	HMDB0000646	Sigma	250 fmol	3.442e
L-Arabitol	HMDB0001851	Tokyo Chemical Industry	25 fmol	3.126f
Levulinic acid	HMDB0000720	Tokyo Chemical Industry	2.5 pmol	3.942
L-Iditol	HMDB0011632	Tokyo Chemical Industry	5 fmol	3.142h
L-Threo-2-pentulose	HMDB0000751	Toronto Research Chemicals	250 fmol	3.442e
L-α-Aspartyl-L-hydroxyproline	HMDB0011160	Cosmo Bio	250 fmol	6.937
Maleic acid	HMDB0000176	Tokyo Chemical Industry	250 fmol	9.553
Malic acid	HMDB0000744	Sigma	250 fmol	8.491
Malondialdehyde	HMDB0006112	Sigma	2.5 pmol	6.641
Mandelic acid	HMDB0000703	Sigma	25 fmol	8.629
Mannitol	HMDB0000765	Sigma	5 fmol	3.142h
Mesaconic acid	HMDB0000749	Sigma	250 fmol	9.815
Methylacetoacetic acid	HMDB0000310	Tokyo Chemical Industry	N/A	Unacceptable peak shape
Methylenediphosphonic acid	N/A	Sigma	500 fmol	16.458
Methylsuccinic acid	HMDB0001844	Sigma	250 fmol	8.223j
Mevalonic acid	HMDB0000227	Sigma	50 fmol	3.749
N-Acetyl-4-aminosalicylic acid	N/A	Wako	2.5 fmol	22.283
N-Acetyl-5-aminosalicylic acid	HMDB0060602	Sigma	5 fmol	20.028
N-Acetyl-D-glucosaminitol	N/A	Sigma	25 fmol	3.164
N-Acetyl-L-alanine	HMDB0000766	Tokyo Chemical Industry	25 fmol	3.648
N-Acetyl-L-asparagine	HMDB0006028	Sigma	25 fmol	3.471
N-Acetyl-L-aspartic acid	HMDB0000812	Sigma	25 fmol	7.491
N-Acetyl-L-cysteine	HMDB0001890	Sigma	25 fmol	8.953
N-Acetyl-L-glutamic acid	HMDB0001138	Wako	25 fmol	7.355
N-Acetyl-L-glutamine	HMDB0006029	Tokyo Chemical Industry	25 fmol	3.442
N-Acetyl-L-glycine	HMDB0000532	Sigma	25 fmol	3.71
N-Acetyl-L-methionine	HMDB0011745	Sigma	25 fmol	4.429
N-Acetyl-L-norvaline	N/A	Thermo Fisher Scientific	5 fmol	4.063
N-Acetyl-L-serine	HMDB0002931	Sigma	25 fmol	3.627k
N-Acetyl-L-threonine	HMDB0062557	Santa Cruz Biotechnology	50 fmol	3.571
N-Acetyl-L-valine	HMDB0011757	Tokyo Chemical Industry	25 fmol	3.888
N-Acetylneuraminic acid	HMDB0000230	Tokyo Chemical Industry	50 fmol	3.847
NAD	HMDB0000902	Wako	5 pmol	8.096
NADPH	HMDB0000221	Sigma	250 fmol	19.496
N-carbamoylglutamic acid	HMDB0062795	Sigma	25 fmol	7.829
N-Tigloylglycine	HMDB0000959	Tokyo Chemical Industry	25 fmol	5.29
O-Acetylserine	HMDB0003011	Sigma	25 fmol	3.627k
Orotic acid	HMDB0000226	Tokyo Chemical Industry	25 fmol	13.485
Pectin	HMDB0003402	Sigma	250 fmol	3.442e
Phenol glucuronide	HMDB0060014	Sigma	250 fmol	8.808
Phenylacetylglycine	HMDB0000821	Wako	25 fmol	8.36
Phenylacetyl-L-glutamine	HMDB0006344	Cosmo Bio	25 fmol	5.707
Phosphoric acid	HMDB0002142	Wako	500 fmol	12.885
Pimelic acid	HMDB0000857	Tokyo Chemical Industry	25 fmol	8.828
Porphobilinogen	HMDB0000245	Sigma	25 nmol	14.176
Pyroglutamic acid	HMDB0000267	Sigma	25 fmol	3.729
Pyruvic acid	HMDB0000243	Wako	50 fmol	9.507c
Quinic acid	HMDB0003072	Tokyo Chemical Industry	5 fmol	3.634
Ribitol	HMDB0000508	Sigma	25 fmol	3.126f
Ribonolactone	HMDB0001900	Sigma	250 fmol	3.813
Salicyluric acid	HMDB0000840	Sigma	50 fmol	29.594
Succinic acid	HMDB0000254	Wako	5 pmol	8.476
Sucrose	HMDB0000258	Sigma	50 fmol	3.178b
Sulfoacetic acid	N/A	Sigma	5 fmol	10.907
Sulfuric acid	HMDB0001448	Wako	2.5 fmol	9.832
Taurine	HMDB0000251	Sigma	25 fmol	4.071
Terephthalic acid	HMDB0002428	Sigma	2.5 fmol	16.305
Thiosulfate	HMDB0000257	Sigma	250 fmol	14.339
Thymidine	HMDB0000273	Wako	25 fmol	6.13
Thymidine 5'-triphosphate	HMDB0001342	Abcam	250 fmol	23.893
Thymine	HMDB0000262	Wako	250 fmol	7.641
trans-Aconitic acid	HMDB0000958	Tokyo Chemical Industry	25 fmol	16.916
Uracil	HMDB0000300	Wako	25 fmol	6.378
Ureidosuccinic acid	HMDB0000828	Funakoshi	25 fmol	8.087
Uric acid	HMDB0000289	Wako	50 fmol	16.312
Uridine	HMDB0000296	Wako	25 fmol	6.834
Uridine 5'-monophosphate	HMDB0000288	Sigma	25 fmol	15.895
Uridine triphosphate	HMDB0000285	Abcam	25 fmol	24.889
Vanillactic acid	HMDB0000913	Sigma	2.5 fmol	12.986
Vanillylmandelic acid	HMDB0000291	Sigma	25 fmol	12.843
α-Ketoadipic acid	HMDB0000225	Sigma	5 fmol	10.017
γ-Carboxyglutamic acid	HMDB0041900	Santa Cruz Biotechnology	50 fmol	13.642
γ-Glutamyl alanine	HMDB0006248	Sigma	500 fmol	6.94
γ-Glutamyl asparagine	HMDB0029144	Cosmo Bio	250 fmol	6.307
γ-Glutamyl aspartic acid	HMDB0030419	Cosmo Bio	250 fmol	11.789
γ-Glutamyl cysteine	HMDB0001049	Sigma	500 fmol	13.661
γ-Glutamyl glutamic acid	HMDB0011737	Cosmo Bio	50 fmol	11.517
γ-Glutamyl glutamine	HMDB0011738	Cosmo Bio	250 fmol	6.215
γ-Glutamyl glycine	HMDB0011667	Cosmo Bio	250 fmol	7.203
γ-Glutamyl isoleucine	HMDB0011170	Santa Cruz Biotechnology	250 fmol	7.657l
γ-Glutamyl leucine	HMDB0011171	Cosmo Bio	250 fmol	7.657l
γ-Glutamyl methionine	HMDB0034367	Cosmo Bio	500 fmol	7.864
γ-Glutamyl phenylalanine	HMDB0000594	Cosmo Bio	2.5 pmol	10.265
γ-Glutamyl proline	HMDB0029157	Cosmo Bio	250 fmol	6.898
γ-Glutamyl serine	HMDB0029158	Cosmo Bio	50 fmol	6.877
γ-Glutamyl threonine	HMDB0029159	Cosmo Bio	250 fmol	6.482
γ-Glutamyl tyrosine	HMDB0011741	Cosmo Bio	500 fmol	14.832
γ-Glutamyl valine	HMDB0011172	Cosmo Bio	250 fmol	7.006
N/A; not applicable. N.D; not ditected.
$; small letters next to retention time indicate a pair or a group of compounds detected in the same retention time.

## Sheet: Table S3
Table S3. Summary of polar metabolites detected in human serum and urine
Compound's name	Formula	HMDB ID#	KEGG ID#	Evidence level
1,3,7-Trimethyluric acid	C8H10N4O3	HMDB0002123	C16361	Expected by mzCloud
1,3-Dimethyluric acid	C7H8N4O3	HMDB0001857	N/A	Validated
1,7-Dimethyluric acid	C7H8N4O3	HMDB0011103	C16356	Validated
1-Deoxy-D-glucitol	C6H14O5	HMDB0041500	N/A	Validated
1-Methyluric acid	C6H6N4O3	HMDB0003099	C16359	Validated
2,3-Dihydroxybutanedioic acid	C6H6O6	HMDB0059916 (L) HMDB0029878 (D)	C00898 (L) C02107 (D) C00552 (DL)	Validated
2,3-Pyridinedicarboxylic acid	C7H5NO4	HMDB0000232	C03722	Validated
2-Deoxyribose	C5H10O4	HMDB0003224	C01801	Validated
2-Furoylglycine	C7H7NO4	HMDB0000439	N/A	Expected by mzCloud
2-Hydroxy-2-methylbutyric acid	C5H10O3	HMDB0001987	N/A	Validated
2-Hydroxy-4-oxopentanedioic acid	C5H5O6	HMDB0002070	C01127	Expected by FISH scoring
2-Hydroxyglutaric acid	C5H8O5	HMDB0000694 (L) HMDB0000606 (D)	C03196 (L) C01087 (D)	Validated
2-Isopropylmalic acid	C7H12O5	HMDB0000402	C02504	Validated
2-Ketoglutaric acid	C5H6O5	HMDB0000208	C00026	Validated
2-O-Benzoyl-D-glucose	C13H16O7	HMDB0034618	N/A	Expected by FISH scoring
2-Pyrroloylglycine	C7H8N2O3	HMDB0059778	N/A	Expected by FISH scoring
3,4-Dihydroxyphenylglycol O-sulfate	C8H10O7S	HMDB0001474	N/A	Expected by FISH scoring
3,7-Dimethyluric acid	C7H8N4O3	HMDB0001982	C16360	Validated
3-Carboxy-4-methyl-5-propyl-2-furanpropionic acid	C12H16O5	HMDB0061112	N/A	Validated
3-Dehydro-L-threonate	C4H6O5	N/A	C03064	Expected by FISH scoring
3-Hydroxy-3-carboxymethyl-adipic acid	C8H12O7	HMDB0059775	N/A	Expected by FISH scoring
3-Hydroxy-3-methylglutaric acid	C6H10O5	HMDB0000355	C03761	Validated
3-Hydroxybutyric acid	C4H8O3	HMDB0000357	C01089 (D)	Validated
3-Hydroxydodecanedioic acid	C12H22O5	HMDB0000413	N/A	Expected by FISH scoring
3-Methoxy-4-hydroxyphenylethyleneglycol sulfate	C9H12O7S	HMDB0000559	N/A	Expected by mzCloud
3-Methyladipic acid	C7H12O4	HMDB0000555	N/A	Validated
3-Methylglutaric acid and/or adipic acid$	C6H10O4	HMDB0000752 or HMDB0000448	N/A or C06104	Validated
3-Sulfonatolactate	C3H6O6S	HMDB0060176	C11499 (L) C11537 (D)	Expected by FISH scoring
4-Acetamidobutanoic acid	C6H11NO3	HMDB0003681	C02946	Expected by mzCloud
4-Hydroxybutyric acid	C4H8O3	HMDB0000710	C00989	Expected by mzCloud
5-Hydroxyindole-3-acetic acid	C10H9NO3	HMDB0000763	C05635	Validated
6-Hydroxy-5-methoxyindole glucuronide	C14H15NO8	HMDB0010362	N/A	Expected by FISH scoring
Allantoic acid	C4H8N4O4	HMDB0001209	C00499	Expected by FISH scoring
Allantoin	C4H6N4O3	HMDB0000462	C01551	Validated
Ascorbic acid-2-sulfate	C6H8O9S	HMDB0060649	N/A	Expected by mzCloud
Aspartic acid	C4H7NO4	HMDB0000191	C00049	Validated
Aspartylaspartic acid	C8H12N2O7	HMDB0028749	N/A	Expected by FISH scoring
Aspartylserine and/or serylaspartic acid$	C7H12N2O6	HMDB0028762 or HMDB0029035	N/A	Expected by FISH scoring
cis-Aconitic acid	C6H6O6	HMDB0000072	C00417	Validated
Citraconic acid and/or itaconic acid$	C5H6O4	HMDB0000634 or HMDB0002092	C02226 or C00490	Validated
Citric acid	C6H8O7	HMDB0000094	C00158	Validated
Cyclic AMP	C10H12N5O6P	HMDB0000058	C00575	Validated
Ethoxyacetic acid	C4H8O3	HMDB0031212	N/A	Validated
Ethylmalonic acid	C5H8O4	HMDB0000622	N/A	Validated
Fumaric acid	C4H4O4	HMDB0000134	C00122	Validated
Gentisic acid	C7H6O4	HMDB0000152	C00628	Validated
Gluconic acid and/or gluconolactone†	C6H12O7 or C6H10O6	HMDB0000625 or HMDB0000150	C00257 or C00198	Validated
Glucose 6-phosphate	C6H13O9P	HMDB0001401	C00092	Validated
Glucuronic acid	C6H10O7	HMDB0000127	C00191	Expected by mzCloud
Glutaric acid and/or methylsuccinic acid$	C5H8O4	HMDB0000661 or	C00489 or	Validated
		HMDB0001844	N/A
Glyceric acid	C3H6O4	HMDB0000139	C00258	Validated
Glycerol	C3H8O3	HMDB0000131	C00116	Validated
Glycerol 3-phosphate	C3H9O6P	HMDB0000126	C00093	Validated
Hippuric acid	C9H9NO3	HMDB0000714	C01586	Validated
Homotaurine	C3H9NO3S	N/A	D06202	Validated
Homovanillic acid sulfate	C9H10O7S	HMDB0011719	N/A	Validated
Hydroxyphenyllactic acid	C9H10O4	HMDB0000755	C03672	Validated
Hydroxypropanedioic acid	C3H4O5	HMDB0035227	C02287	Expected by FISH scoring
Indole-3-acetic acid	C10H9NO2	HMDB0000197	C00954	Validated
Indole-3-lactic acid	C11H11NO3	HMDB0000671	C02043	Validated
Indoleacetyl glutamine	C15H17N3O4	HMDB0013240	N/A	Expected by FISH scoring
Isethionic acid	C2H6O4S	HMDB0003903	C05123	Validated
Isocitric acid	C6H8O7	HMDB0000193	C00311	Validated
Lactic acid	C3H6O3	HMDB0000190	C00186	Validated
L-Tyrosine methyl ester 4-sulfate	C10H13NO6S	N/A	C04201	Expected by FISH scoring
Maleic acid	C4H4O4	HMDB0000176	C01384	Validated
Malic acid	C4H6O5	HMDB0000744 (DL) HMDB0000156 (L) HMDB0031518 (D)	C00711 (DL) C00149 (L) C00497 (D)	Validated
Mandelic acid	C8H8O3	HMDB0000703 (L) HMDB0062635 (D)	C01984 (L) C01984 (D)	Validated
Mevalonic acid	C6H12O4	HMDB0000227	C00418	Validated
N-Acetylaspartylglutamic acid	C11H16N2O8	HMDB0001067	C12270	Expected by mzCloud
N-Acetyl-D-galactosamine 4-sulfate	C8H15NO9S	HMDB0000781	C16265	Expected by mzCloud
N-Acetyl-D-glucosaminitol	C8H17NO6	N/A	N/A	Validated
N-Acetylgalactosamine 4,6-disulfate	C8H15NO12S2	HMDB0000843	N/A	Expected by FISH scoring
N-Acetyl-L-2-aminoadipic acid	C8H13NO5	HMDB0062715	N/A	Expected by FISH scoring
N-Acetyl-L-alanine	C5H9NO3	HMDB0000766	N/A	Validated
N-Acetyl-L-asparagine	C6H10N2O4	HMDB0006028	N/A	Validated
N-Acetyl-L-aspartic acid	C6H9NO5	HMDB0000812	C01042	Validated
N-Acetyl-L-cysteine	C5H9NO3S	HMDB0001890	C06809	Validated
N-Acetyl-L-glutamic acid	C7H11NO5	HMDB0001138	C00624	Validated
N-Acetyl-L-glutamine	C7H12N2O4	HMDB0006029	N/A	Validated
N-Acetyl-L-glycine	C4H7NO3	HMDB0000532	N/A	Validated
N-Acetyl-L-methionine	C7H13NO3S	HMDB0011745	C02712	Validated
N-Acetyl-L-threonine	C6H11NO4	HMDB0062557	N/A	Validated
N-Acetyl-L-tyrosine	C11H13NO4	HMDB0000866	C01657	Expected by mzCloud
N-Acetyl-L-valine	C7H13NO3	HMDB0011757	N/A	Validated
N-Acetylneuraminic acid	C11H19NO9	HMDB0000230	C19910	Validated
N-carbamoylglutamic acid	C6H10N2O5	HMDB0062795	N/A	Validated
Neomenthol-glucuronide	C16H28O7	HMDB0060012	N/A	Expected by FISH scoring
N-Phenylacetylglutamic acid	C13H15NO5	HMDB0059772	N/A	Expected by FISH scoring
N-Tigloylglycine	C7H11NO3	HMDB0000959	N/A	Validated
O-Acetylserine and/or N-acetyl serine$	C5H9NO4	HMDB0003011 or HMDB0002931	C00979 or N/A	Validated
Orotic acid	C5H4N2O4	HMDB0000226	C00295	Validated
Orotidine	C10H12N2O8	HMDB0000788	C01103	Expected by mzCloud
Oxalic acid	C2H2O4	HMDB0002329	C00209	Expected by Chemspider
Pantothenic acid	C9H17NO5	HMDB0000210	C00864	Expected by mzCloud
p-Cresol	C7H8O	HMDB0001858	C01468	Expected by mzCloud
Phenol	C6H6O	HMDB0000228	C00146	Expected by Chemspider
Phenol glucuronide	C12H14O7	HMDB0060014	N/A	Validated
Phenylacetylglycine	C10H11NO3	HMDB0000821	C05598	Validated
Phenylacetyl-L-glutamine	C13H16N2O4	HMDB0006344	C04148	Validated
Phosphoric acid	H3PO4	HMDB0002142	C00009	Validated
Pimelic Acid	C7H12O4	HMDB0000857	C02656	Validated
Pseudouridine	C9H12N2O6	HMDB0000767	C02067	Expected by mzCloud
Pyrogallol-1-O-sulphate	C6H6O6S	HMDB0060016	N/A	Expected by FISH scoring
Pyroglutamic acid	C5H7NO3	HMDB0000267	C01879	Validated
Pyruvic acid¶ and/or ascorbic acid	C3H4O3 or C6H8O6	HMDB0000243 or HMDB0000044	C00022 or C01041	Validated
Quinic acid	C7H12O6	HMDB0003072	C00296	Validated
Ribonolactone	C5H8O5	HMDB0001900	C02674	Validated
Salicyluric acid	C9H9NO4	HMDB0000840	C07588	Validated
Succinic acid	C4H6O4	HMDB0000254	C00042	Validated
Sulfoacetic acid	C2H4O5S	N/A	C14179	Validated
Sulfuric acid	H2SO4	HMDB0001448	C00059	Validated
Taurine	C2H7NO3S	HMDB0000251	C00245	Validated
Thiosulfate	H2S2O3	HMDB0000257	C00320	Validated
Threonic acid	C4H8O5	HMDB0000943 (D) HMDB0062620 (L)	C01620 (L)	Expected by mzCloud
trans-Aconitic acid	C6H6O6	HMDB0000958	C02341	Validated
Uracil	C4H4N2O2	HMDB0000300	C00106	Validated
Ureidosuccinic acid	C5H8N2O5	HMDB0000828	C00438	Validated
Uric acid	C5H4N4O3	HMDB0000289	C00366	Validated
Uridine	C9H12N2O6	HMDB0000296	C00299	Validated
Vanilloylglycine	C10H11NO5	HMDB0060026	NA	Expected by FISH scoring
Vanillylmandelic acid	C9H10O5	HMDB0000291	C05584	Validated
Xylulosonic acid	C5H8O6	N/A	C02928	Expected by FISH scoring
α-Ketoadipic acid	C6H8O5	HMDB0000225	C00322	Validated
β-Citryl-L-glutamic acid	C11H15NO10	HMDB0013220	C20775	Expected by FISH scoring
γ-Carboxyglutamic acid	C6H9NO6	HMDB0041900	N/A	Validated
γ-Glutamyl asparagine	C9H15N3O6	HMDB0029144	N/A	Validated
γ-Glutamyl aspartic acid	C9H14N2O7	HMDB0030419	N/A	Validated
γ-Glutamyl glutamine	C10H17N3O6	HMDB0011738	C05283	Validated
γ-Glutamyl glycine	C7H12N2O5	HMDB0011667	N/A	Validated
γ-Glutamyl valine	C10H18N2O5	HMDB0011172	N/A	Validated
L or D in parentheses indicates l-form or d-form, respectively.
"Validated" indicates that a metabolite was identified using standard chemicals.
$: the retention time of the listed two compounds is the same.
†: gluconolactone is detected as gluconic acid in the current system.
¶: pyruvic acid is detected as dimer which presents the same retention time and m/z value with ascorbic acid.
#: human metabolome database (HMDB) and KEGG ID of available enantiomers for a single compound are shown, as the current method cannot distinguish them.
N/A: not applicable.

## Sheet: Table S4
Table S4. Normalized relative peak areas of polar metabolites in each individual
Names	Subject ID	FS1	FS2	FS3	FS4	FS5	FS6	FS7	FS8	FS9	FS10	FS11	FS12	FS13	FS14	FS15	FU1	FU2	FU3	FU4	FU5	FU6	FU7	FU8	FU9	FU10	FU11	FU12	FU13	FU14	FU15		MS1	MS2	MS3	MS4	MS5	MS6	MS7	MS8	MS9	MS10	MS11	MS12	MS13	MS14	MS15	MU1	MU2
	Gender	Female	Female	Female	Female	Female	Female	Female	Female	Female	Female	Female	Female	Female	Female	Female	Female	Female	Female	Female	Female	Female	Female	Female	Female	Female	Female	Female	Female	Female	Female		Male	Male	Male	Male	Male	Male	Male	Male	Male	Male	Male	Male	Male	Male	Male	Male	Male
	Matrix	Serum	Serum	Serum	Serum	Serum	Serum	Serum	Serum	Serum	Serum	Serum	Serum	Serum	Serum	Serum	Urine	Urine	Urine	Urine	Urine	Urine	Urine	Urine	Urine	Urine	Urine	Urine	Urine	Urine	Urine		Serum	Serum	Serum	Serum	Serum	Serum	Serum	Serum	Serum	Serum	Serum	Serum	Serum	Serum	Serum	Urine	Urine
1,3,7-Trimethyluric acid		0.000211627	0.000233502	0.000192775	0.000280763	0.000172905	0.000250077	0.000184732	0.00018204	0.000229793	0.000189516	0.000216536	0.000254546	0.000199454	0.000255709	0.00029042	0.0167578	0.00143024	0.00477801	0.034052	0.0709767	0.102963	0.0619598	0.0346858	0.00304973	0.0210212	0.037436	0.0792046	0.00590183	0.00497599	0.0445044		0.000199688	0.000202522	0.00022334	0.000222811	0.000198484	0.000205543	0.000196768	0.000183054	0.000163208	0.000185805	0.000193321	0.000226334	0.000222067	0.000221079	0.000203085	0.0709951	0.00965005
1,3-Dimethyluric acid		0.000388493	0.000235957	0.000197356	0.000268114	0.00117386	0.00026412	0.000428432	0.000163472	0.000240504	0.00020111	0.000222196	0.000248445	0.000213517	0.000184354	0.000234119	0.107583	0.0217854	0.0718975	0.108803	0.429508	0.325891	0.277273	0.0704635	0.024268	0.204462	0.194116	0.147364	0.0442762	0.0348353	0.176501		0.00053191	0.000196883	0.000202992	0.000374106	0.000403151	0.000178692	0.000172678	0.000175662	0.000203962	0.000187833	0.000477132	0.000412709	0.000257371	0.000182682	0.000199883	0.136274	0.0399883
1,7-Dimethyluric acid		0.00157204	0.000226091	0.00052941	0.00156662	0.00422547	0.00409881	0.00368482	0.00144206	0.000315631	0.00186078	0.00308388	0.00200379	0.000236018	0.000922478	0.00133053	0.0527367	0.121201	0.27405	0.678633	1.87252	1.91628	1.56745	0.502088	0.201378	0.953612	1.25866	1.1296	0.330089	0.486712	0.653559		0.00688062	0.000914014	0.00156388	0.00863931	0.00207104	0.000309569	0.000173701	0.000306588	0.00053346	0.0014658	0.00104067	0.00546382	0.000703825	0.000169941	0.000370757	2.81387	0.570475
1-Deoxy-D-glucitol		0.0120956	0.00125867	0.0184513	0.0012992	0.00115562	0.00568257	0.0184751	0.0133214	0.00107299	0.0119805	0.0150515	0.00306494	0.00685829	0.00927355	0.00126995	0.231547	0.206674	0.217883	0.393092	0.265086	0.209795	0.396149	0.29157	0.260604	0.228453	0.281147	0.453233	0.45167	0.253728	0.34401		0.0160328	0.011968	0.00166927	0.00123944	0.0013878	0.00362731	0.0213198	0.0181981	0.009654	0.00152748	0.00121193	0.00147337	0.00119952	0.0195147	0.00514671	0.283072	0.282706
1-Methyluric acid		0.00383132	0.00211658	0.00535293	0.00662714	0.0109335	0.00393266	0.0139819	0.00210958	0.000948531	0.00409961	0.004455	0.00862138	0.000759248	0.00273444	0.0020526	2.04146	0.500052	2.21554	2.49276	3.89566	1.43107	5.04928	0.765989	0.306045	1.31574	2.14881	3.24147	0.4401	1.1998	1.01778		0.0106801	0.00295604	0.00397218	0.0111838	0.0121244	0.00182397	0.00168199	0.00153516	0.00181915	0.00381746	0.0132085	0.0149961	0.00140433	0.00119954	0.0015573	2.74647	1.53095
2,3-Dihydroxybutanedioic acid		0.00253542	0.00125358	0.0034457	0.00160216	0.00141004	0.00233694	0.00210385	0.00282936	0.001734	0.00248779	0.00278079	0.00181067	0.00432526	0.00220305	0.00189539	0.0245043	0.0177931	0.473151	0.0384617	0.049684	0.0265727	0.0408768	0.0180816	0.0323259	0.109139	0.0370623	0.130369	0.0825948	0.0567725	0.0312447		0.00213346	0.00209835	0.0014283	0.00160326	0.00164625	0.00163394	0.00203008	0.00200041	0.00282763	0.00183746	0.00143163	0.00204101	0.00168809	0.00303033	0.00195528	0.0303941	0.0384581
2,3-Pyridinedicarboxylic acid		0.00248317	0.00424564	0.00557277	0.00894279	0.00703662	0.00429854	0.00672777	0.00502039	0.00920396	0.00415675	0.00426958	0.00497539	0.00444077	0.00384703	0.00323218	0.321573	0.53935	0.390568	0.645776	0.714789	0.43804	0.38868	0.462705	0.69847	0.402591	0.429585	0.448358	0.59341	0.330204	0.343055		0.00470657	0.00402656	0.00701084	0.00293823	0.00414583	0.00466654	0.00524934	0.00612226	0.00603097	0.00419431	0.00469145	0.00399762	0.00476267	0.00218589	0.00310708	0.416929	0.542593
2-Deoxyribose		0.0174831	0.0138866	0.018923	0.0144459	0.0191062	0.0182241	0.0165118	0.0166052	0.00647276	0.0151158	0.0175558	0.0143034	0.0106029	0.0155252	0.0148141	0.626507	0.55064	1.29314	1.75152	1.18211	0.818329	0.793112	1.11431	0.450699	0.64333	0.741616	1.5913	0.626297	0.758456	0.765215		0.0257881	0.0201187	0.0163309	0.0222341	0.0171676	0.016839	0.0163722	0.0131321	0.0198788	0.0153568	0.016673	0.0221204	0.010104	0.0203049	0.0138195	1.24533	0.693739
2-Furoylglycine		0.000121197	0.000159922	0.000134894	0.00034183	0.00203046	0.000155878	0.000106678	0.000133167	0.000181013	0.000152922	0.00016679	0.000169861	0.000256009	0.000137454	0.000203498	0.103585	0.114519	0.124102	0.405804	1.31744	0.148788	0.12018	0.133645	0.0224733	0.127614	0.0476593	0.126939	0.261412	0.0287044	0.0231135		0.000675723	0.000170508	0.00015457	0.000163143	0.000122485	0.000181268	0.000132203	0.000149369	0.000317374	0.000150428	0.000157542	0.000195764	0.000158494	0.000166215	0.000138538	0.980976	0.0251474
2-Hydroxy-2-methylbutyric acid		0.0377586	0.0583656	0.0566626	0.0469621	0.0421105	0.0433638	0.0383219	0.0385624	0.0537553	0.03886	0.0439539	0.0410341	0.0379646	0.0335186	0.0516877	0.0804158	0.123987	0.0402449	0.12964	0.0600709	0.162905	0.0550468	0.178797	0.0519232	0.0751722	0.372868	0.0681436	0.0822098	0.0352488	0.107803		0.0434883	0.0654953	0.00837651	0.042797	0.0645655	0.0722146	0.0643083	0.0601479	0.0624356	0.0420054	0.0461701	0.0515153	0.0570336	0.0440659	0.0283408	0.751148	0.0699732
2-Hydroxy-4-oxopentanedioic acid		0.0165355	0.000848911	0.0103155	0.000969692	0.00087164	0.00669187	0.0149666	0.0104796	0.000928488	0.0086402	0.00947578	0.00173864	0.0218953	0.0079135	0.000861616	0.00744893	0.00465011	0.0170864	0.00688132	0.0126621	0.0108907	0.0571032	0.0106044	0.0118789	0.0123403	0.0614666	0.0192509	0.00589627	0.0503187	0.0200483		0.014442	0.00598912	0.00100781	0.000904955	0.000937259	0.00292647	0.0128913	0.011414	0.0095685	0.000983096	0.000777634	0.00078085	0.00110287	0.00860226	0.00548363	0.00847192	0.00636645
2-Hydroxyglutaric acid		0.0652333	0.0513844	0.0645534	0.0383876	0.0631646	0.0694844	0.0620838	0.0583997	0.0451038	0.0817302	0.0542175	0.0378722	0.0588147	0.0530042	0.0550111	2.66598	2.02776	1.66956	2.06333	2.39204	4.56047	2.59669	1.7465	2.07042	2.8095	1.80896	2.25417	2.60414	1.96208	2.2666		0.0768002	0.0504405	0.0403942	0.0581013	0.0541172	0.0459852	0.0475411	0.0611066	0.0750164	0.035745	0.0378739	0.0483465	0.0463773	0.053445	0.0547796	3.70411	2.43183
2-Isopropylmalic acid		0.00288587	0.00343772	0.00355709	0.00368089	0.00428503	0.00296887	0.00269593	0.00238593	0.00296552	0.00423071	0.00284192	0.00385579	0.00214111	0.00449942	0.00340379	0.0545038	0.0367434	0.187088	0.136299	0.0913647	0.0364109	0.0523909	0.0269649	0.0661842	0.0476011	0.0718476	0.0415769	0.0336896	0.0597283	0.0373965		0.0038235	0.00383674	0.00289818	0.00507075	0.0041806	0.00310973	0.00381659	0.0036814	0.00421595	0.00449135	0.00231585	0.00349848	0.00438939	0.00323045	0.00338713	0.328231	0.110763
2-Ketoglutaric acid		0.346944	0.2752	0.266069	0.353172	0.273117	0.291495	0.394273	0.363596	0.368891	0.353086	0.429238	0.297651	0.397448	0.464489	0.322542	9.26766	1.15886	2.74532	1.04794	2.30928	5.54766	14.9102	2.23831	3.94356	5.34087	5.2813	7.05731	4.24963	2.8879	1.26252		0.298872	0.28348	0.260102	0.21349	0.263924	0.288706	0.279702	0.2519	0.268746	0.335277	0.346657	0.405554	0.368924	0.345832	0.361967	3.50753	2.08735
2-O-Benzoyl-D-glucose		0.000647625	0.00132568	0.000211175	0.000187929	0.00120413	0.000312768	0.000470203	0.000430254	0.000195597	0.000903445	0.000179158	0.000216948	0.000940449	0.000808142	0.000242478	0.391921	0.59415	0.0327751	0.0530558	0.548115	0.202145	0.339738	0.230555	0.145684	0.570551	0.0493013	0.0885615	0.971727	0.492773	0.0737002		0.000164345	0.000578907	0.000179374	0.000166384	0.000572268	0.00182173	0.000176383	0.000179189	0.00016301	0.00069618	0.00047807	0.000507255	0.000208276	0.000456692	0.000203715	0.0429829	0.978283
2-Pyrroloylglycine		0.000134085	0.000189504	0.000183761	0.000159252	0.000165286	0.000178894	0.000122023	0.000126337	0.000210021	0.000159466	0.000151995	0.000189524	0.000158379	0.000146589	0.000190493	0.0445922	0.0985329	0.0455264	0.0516151	0.0681226	0.066382	0.113452	0.069912	0.0413747	0.0488528	0.0801537	0.0773521	0.0753935	0.0479235	0.0848463		0.000154824	0.000167696	0.000170298	0.000148308	0.000146324	0.000184774	0.000138476	0.000155959	0.000147958	0.000145849	0.000136945	0.000197423	0.000161275	0.000163487	0.000187272	0.0706903	0.121038
3,4-Dihydroxyphenylglycol O-sulfate		0.000297149	0.000311648	0.00034334	0.000571036	0.000618523	0.000454033	0.000742115	0.00049466	0.00073013	0.000626581	0.000706519	0.000746268	0.000548378	0.000262886	0.000237508	0.0846367	0.0775329	0.0871047	0.0950028	0.0573467	0.0625867	0.149961	0.0631813	0.0855917	0.0865314	0.0592437	0.0935167	0.0523443	0.0732154	0.0591093		0.00028684	0.000685046	0.0006802	0.000696774	0.000572736	0.000377805	0.000502836	0.000282348	0.000246795	0.000603824	0.000450347	0.00058484	0.00045747	0.000580757	0.000838805	0.0645315	0.0684786
3,7-Dimethyluric acid		0.000177479	0.000220168	0.000211237	0.000195886	0.000193875	0.000178265	0.000170548	0.000149987	0.000223129	0.000204642	0.000180504	0.000254324	0.000201591	0.000178426	0.000268367	0.00759638	0.00936637	0.0126296	0.0416129	0.038138	0.0056539	0.0372173	0.00493683	0.00781262	0.00972739	0.0749534	0.0114006	0.00627044	0.0111334	0.0557367		0.000198374	0.000180836	0.000191043	0.000174456	0.00019702	0.000191705	0.000170922	0.000193856	0.000173393	0.000199913	0.00016026	0.000193931	0.000197575	0.000164528	0.000221803	0.00809201	0.00660586
3-Carboxy-4-methyl-5-propyl-2-furanpropionic acid		0.100048	0.117173	0.0527176	0.0372859	0.0233855	0.05745	0.0572419	0.150244	0.0578687	0.0964034	0.0647239	0.0526397	0.176266	0.0883603	0.199063	0.0388779	0.0220758	0.00691835	0.00306679	0.00559174	0.00430828	0.00785353	0.0334166	0.00425415	0.0114495	0.00934966	0.00296202	0.0479024	0.018383	0.00924425		0.0866438	0.0234059	0.160535	0.146965	0.0937842	0.146414	0.0784582	0.0638505	0.0395152	0.0949801	0.0680126	0.057517	0.0542027	0.107692	0.0428015	0.00177606	0.00366607
3-Dehydro-L-threonate		0.00105445	0.00262441	0.00100457	0.001545	0.000861526	0.00121991	0.000765656	0.00117693	0.00086354	0.00120415	0.0012664	0.00100664	0.000504706	0.00145565	0.00277951	0.0903928	0.0141068	0.120172	0.1125	0.1287	0.130204	0.10991	0.102657	0.107643	0.061544	0.128125	0.0760487	0.0448537	0.100762	0.210723		0.00113187	0.000935095	0.00108188	0.00143983	0.00162231	0.00207074	0.000954133	0.00106221	0.000936275	0.00195288	0.00194736	0.00119397	0.00155454	0.00128172	0.00106542	0.078972	0.108109
3-Hydroxy-3-carboxymethyl-adipic acid		0.000356996	0.000165644	0.000278639	0.000141607	0.000135384	0.000152281	0.000222186	0.000148475	0.000160819	0.000340309	0.000324821	0.000145697	0.000226131	0.000233709	0.000214413	0.00208923	0.00752966	0.0215086	0.0273591	0.00282855	0.0035486	0.0103985	0.00364149	0.0068023	0.0119033	0.00703054	0.0014799	0.207106	0.00365732	0.0509225		0.000272825	0.000170916	0.000148648	0.000142232	0.000146075	0.000175123	0.000221629	0.000442821	0.000164808	0.00014764	0.000246203	0.000128512	0.000344808	0.000161993	0.000201803	0.00121316	0.0038981
3-Hydroxy-3-methylglutaric acid		0.0369182	0.00997268	0.0258992	0.00718667	0.00626484	0.0248145	0.0217396	0.0338505	0.00783276	0.026571	0.0374633	0.0119667	0.023871	0.0249977	0.00760544	1.04825	1.63851	1.05284	0.937886	0.69524	1.41618	0.845925	1.02153	0.892413	0.879652	1.05251	1.00666	0.923686	0.875802	0.944705		0.0265894	0.0243522	0.00780742	0.0111844	0.010057	0.0183197	0.024167	0.025165	0.0263734	0.00929935	0.00648068	0.00879741	0.00910991	0.0281979	0.0183976	0.958875	1.26495
3-Hydroxybutyric acid		0.268255	1.10021	1.01226	0.0774588	0.0714369	0.239763	0.22543	0.257776	0.137366	0.296066	0.287126	0.580454	0.27276	0.0890208	0.194393	0.424873	1.09954	0.064785	0.64337	0.265732	0.600106	0.206086	0.584253	0.253314	0.821994	0.464999	0.533434	0.769357	1.06241	0.390822		0.120184	0.400414	0.351282	0.0934559	0.141334	0.128746	0.493505	0.494057	0.136354	0.080944	0.502783	0.100402	0.164214	0.218928	0.0159295	0.445249	0.775873
3-Hydroxydodecanedioic acid		0.000459286	0.000362757	0.000553432	0.000246736	0.000202652	0.000372663	0.000320202	0.000349889	0.00044951	0.000299131	0.00036853	0.000338399	0.000513544	0.000245874	0.000469479	0.0369582	0.014164	0.0340253	0.015762	0.00402165	0.00572003	0.0081984	0.0198894	0.0265385	0.00295523	0.019406	0.0148444	0.0645697	0.025972	0.0124813		0.00041658	0.000370401	0.0003574	0.000403389	0.000418252	0.000330205	0.000383435	0.000338971	0.00034203	0.000275365	0.000214813	0.000350561	0.000403575	0.000460325	0.000391319	0.00817628	0.032151
3-Methoxy-4-hydroxyphenylethyleneglycol sulfate		0.000271889	0.000428582	0.000499369	0.000254269	0.000225654	0.000203382	0.000666914	0.000356708	0.000427766	0.000424549	0.000193996	0.000241254	0.000240586	0.00030484	0.000255961	0.125829	0.143517	0.150923	0.081557	0.0800254	0.112353	0.190167	0.132923	0.156975	0.163351	0.132949	0.129441	0.152917	0.128884	0.176522		0.000378189	0.000205803	0.000458562	0.000667566	0.000573003	0.000585319	0.000197922	0.000187508	0.000220539	0.000331498	0.000353713	0.000384104	0.000314786	0.000262879	0.000391127	0.137774	0.161115
3-Methyladipic acid		0.00156722	0.00976538	0.00212748	0.00215884	0.0010648	0.00172746	0.00252565	0.00178482	0.0017187	0.00303977	0.00210468	0.00216331	0.00253383	0.0016278	0.00243311	0.329448	3.18895	0.428142	0.663986	0.140222	0.232422	0.531772	0.410256	0.412834	0.436626	0.466036	0.373248	0.813438	0.457023	0.441584		0.00343799	0.00162763	0.00207547	0.00299192	0.00577762	0.00568312	0.00200584	0.0018507	0.00166178	0.00486878	0.00208072	0.00156496	0.00179972	0.00256335	0.00195072	0.435008	0.384947
3-Methylglutaric acid or adipic acid		0.0527226	0.0552055	0.0450308	0.049658	0.0469901	0.0612138	0.045366	0.047201	0.0466621	0.0581945	0.0583996	0.060821	0.0536202	0.0422111	0.0455965	0.632123	1.26221	0.888523	0.55317	0.425264	0.718438	0.735902	0.446098	0.4914	0.426053	1.4956	0.503313	0.543847	0.541661	0.709227		0.0577863	0.0532899	0.0406733	0.0605577	0.0521995	0.0414179	0.0536606	0.0560234	0.0617492	0.0426591	0.040925	0.0468502	0.0521914	0.0424327	0.0460945	0.542742	0.373264
3-Sulfonatolactate		0.00156064	0.000721266	0.00143908	0.000895697	0.000676239	0.00154253	0.0014242	0.00128148	0.000594694	0.00161113	0.0011749	0.000698605	0.00135298	0.00118337	0.000437353	0.121207	0.353141	0.0686992	0.194403	0.0596751	0.365343	0.0988537	0.0809392	0.088285	0.212592	0.0681605	0.12904	0.138567	0.132151	0.11737		0.00168406	0.00155283	0.00080876	0.000576705	0.000660225	0.00085039	0.00120666	0.00126681	0.00122963	0.000627513	0.000703463	0.00049043	0.000777438	0.0013509	0.00108856	0.197958	0.198566
4-Acetamidobutanoic acid		0.00131799	0.00272549	0.00238689	0.00233949	0.00159511	0.00299977	0.0024658	0.00212545	0.00218724	0.00169855	0.00225811	0.0010995	0.0016564	0.00189919	0.00174303	0.475446	0.689601	0.714124	0.768224	0.451154	0.972205	0.568979	0.68904	0.682014	0.508513	0.811853	0.443651	0.586209	0.674522	0.576082		0.00155463	0.00186736	0.00256056	0.00202956	0.00334144	0.00240601	0.00169606	0.00224838	0.00289212	0.00239682	0.00182412	0.00226218	0.00268504	0.00224354	0.00241892	0.487862	0.73193
4-Hydroxybutyric acid		0.486549	1.12607	0.6043	0.403263	0.343276	0.500906	0.423441	0.593415	0.570744	0.759941	0.577004	0.831629	0.663367	0.406167	0.443964	0.0245817	0.0407338	0.0339371	0.054096	0.0361429	0.0475386	0.0480597	0.0170163	0.0450964	0.030231	0.039512	0.055492	0.0538408	0.077963	0.0622969		0.42107	1.05514	0.82167	0.341555	0.4468	0.484437	0.86123	1.04389	0.435476	0.296304	0.687248	0.447711	0.0743975	0.522901	0.339702	0.0637085	0.0486662
5-Hydroxyindole-3-acetic acid		0.000185518	0.000202776	0.000209315	0.000198461	0.000201742	0.000267182	0.000171164	0.000176402	0.000205226	0.000213692	0.000192186	0.000213221	0.000184536	0.000192281	0.000229354	0.0502278	0.105544	0.0493489	0.0524052	0.0418536	0.065178	0.0496955	0.0597691	0.0379988	0.0556317	0.0514982	0.0452047	0.0585327	0.0578963	0.0763782		0.000183496	0.000199155	0.000193523	0.000208382	0.000187474	0.000339855	0.000184216	0.000169866	0.000202863	0.000221235	0.000159821	0.000192436	0.000196838	0.000163053	0.000223025	0.067105	0.0992878
6-Hydroxy-5-methoxyindole glucuronide		0.000228968	0.000218864	0.000226655	0.000241333	0.00021019	0.000226165	0.000172019	0.000179066	0.000384592	0.000225536	0.000232961	0.000244095	0.000360712	0.000208974	0.000257247	0.0611474	0.0994886	0.0124084	0.0304946	0.129187	0.117425	0.134478	0.101293	0.0969241	0.141287	0.0470033	0.0870257	0.202773	0.0872735	0.0579435		0.000181201	0.000208239	0.000242099	0.000243808	0.000216086	0.000229261	0.000197245	0.000313399	0.000227509	0.000202468	0.00021786	0.000245574	0.000253128	0.00020547	0.000229655	0.0336923	0.111279
Allantoic acid		0.000477898	0.000539973	0.000577649	0.000505113	0.000715284	0.000704464	0.000685581	0.000573651	0.000701724	0.000496923	0.000645725	0.00068835	0.00059697	0.000632411	0.000648289	0.0201052	0.00587827	0.00555835	0.00575118	0.118071	0.0198393	0.0442783	0.0167257	0.0296625	0.0103956	0.00521612	0.0199164	0.00771901	0.00877244	0.0194839		0.000535022	0.000585714	0.000537581	0.000715748	0.000564198	0.000664625	0.000653443	0.000677176	0.000603408	0.000704885	0.000598741	0.000642254	0.000610684	0.000557578	0.000751422	0.0274298	0.0276923
Allantoin		0.0176958	0.028338	0.0276466	0.0288479	0.0267768	0.0342144	0.0234635	0.0229219	0.0271566	0.0303608	0.0304585	0.0309409	0.0197973	0.0198815	0.0314887	0.119498	0.0666773	0.233281	0.215233	0.299413	0.114743	0.329355	0.180618	0.121573	0.167255	0.320942	0.13222	0.110764	0.246387	0.437243		0.0323216	0.0315095	0.0478332	0.0358693	0.0461743	0.0446702	0.0399095	0.0389411	0.0469019	0.047132	0.0399146	0.049174	0.0561078	0.0329672	0.0412737	0.107454	0.139143
Ascorbic acid-2-sulfate		0.00382162	0.00660089	0.00372302	0.00323592	0.00312301	0.00316744	0.00429424	0.00500932	0.00529736	0.0037836	0.00283732	0.00438132	0.00263578	0.00560576	0.00537271	0.374902	0.576424	0.313546	0.188533	0.220582	0.331758	0.393288	0.603448	0.503099	0.402336	0.310849	0.468181	0.442747	0.6325	0.593007		0.00702531	0.00354244	0.00437255	0.0050199	0.00588728	0.0050724	0.00361781	0.0037211	0.00461375	0.00747756	0.00524666	0.00397742	0.00397627	0.00510261	0.00562657	0.475517	0.407363
Aspartic acid		0.0644056	0.083198	0.144307	0.115329	0.102623	0.156566	0.0729356	0.123254	0.0890751	0.0981803	0.157434	0.11617	0.132574	0.100283	0.184581	0.0145099	0.00294225	0.00915655	0.023759	0.0232642	0.0189925	0.0107584	0.0254882	0.0220001	0.0172672	0.0315111	0.00444493	0.0183089	0.031481	0.0110097		0.126277	0.102383	0.155172	0.142389	0.148943	0.102316	0.141845	0.156775	0.0662595	0.114057	0.115855	0.111398	0.170329	0.120141	0.116434	0.0175608	0.0029769
Aspartylaspartic acid		0.000212441	0.000201654	0.00020565	0.00021567	0.000189793	0.00018726	0.000188165	0.000169674	0.000233198	0.000230799	0.000236293	0.000250105	0.00021165	0.000204324	0.00025886	0.0391131	0.031821	0.0243846	0.0362355	0.0214942	0.0363996	0.016293	0.0231519	0.0386582	0.0331951	0.0255121	0.0341743	0.0420629	0.0313766	0.0140275		0.000231276	0.000225719	0.000204986	0.000219734	0.000299099	0.000240491	0.000196489	0.0001733	0.000204409	0.000311762	0.000222959	0.000219843	0.000261955	0.000210393	0.00022603	0.0286818	0.0407697
Aspartylserine or serylaspartic acid		0.000163903	0.000191441	0.000165313	0.000179719	0.000178234	0.000179671	0.000138753	0.000156085	0.000205583	0.00018979	0.00018505	0.000202024	0.000195007	0.00017709	0.000213695	0.0254127	0.0325009	0.0308076	0.0328389	0.0330103	0.0305936	0.0308956	0.0298173	0.0312122	0.0403259	0.0238814	0.0364952	0.0301061	0.0220966	0.0308076		0.000153418	0.000166337	0.000213874	0.000172143	0.000136594	0.000179957	0.000163186	0.000167322	0.000158453	0.000168889	0.00015624	0.000180578	0.000164291	0.000168709	0.000186681	0.0407901	0.0259104
cis-Aconitic acid		0.019052	0.0154334	0.013788	0.0198828	0.0154329	0.0175722	0.0211943	0.0200318	0.0212766	0.0154425	0.0126312	0.0153504	0.0192207	0.0129955	0.00997971	7.26618	7.97063	5.27323	4.96713	9.56579	8.36673	5.90446	5.42953	7.2064	5.60262	7.31754	6.86759	9.66356	6.92338	4.90893		0.0100398	0.0166826	0.0144172	0.0148118	0.0146875	0.0136691	0.0187614	0.0173262	0.0136049	0.013621	0.016357	0.0144335	0.0157475	0.013137	0.0129581	6.33842	9.62008
Citraconic acid or itaconic acid		0.0182484	0.00557444	0.0193951	0.00829953	0.00791695	0.0102159	0.0145588	0.0156196	0.006559	0.014356	0.0150953	0.00697478	0.0244176	0.0120919	0.00550057	0.0509389	0.0233045	0.274456	0.156139	0.277986	0.0623025	0.0714686	0.0530765	0.0242336	0.0264928	0.0602697	0.0704548	0.0297	0.037768	0.0349431		0.0190985	0.0130039	0.00684417	0.00979393	0.00630152	0.00954064	0.0145046	0.0139414	0.0170079	0.00781288	0.00492073	0.00670918	0.00723617	0.0160174	0.0127063	0.0907988	0.0131973
Citric acid		1.32301	0.79776	0.891873	0.729575	1.01977	0.864346	1.15612	1.03502	1.42538	0.915533	0.682017	0.837136	1.24472	0.682283	0.556783	94.9572	40.4272	38.2373	21.6809	21.514	22.2847	20.4181	52.2622	187.779	95.9267	43.6355	69.6774	93.2017	65.2937	4.09331		0.49359	1.00069	0.675214	0.870093	0.725297	0.816302	0.923562	0.825408	0.615034	0.673468	0.792479	0.810612	0.885554	0.774527	0.590254	29.5322	52.9691
Cyclic AMP		0.000169996	0.000177675	0.000163733	0.000185781	0.000176613	0.000146418	0.000114863	0.00014237	0.000200444	0.000184685	0.000155508	0.000190389	0.000160484	0.0001635	0.000204223	0.0214482	0.0282316	0.0225791	0.0172396	0.0193699	0.021663	0.0284692	0.0261843	0.021227	0.0179373	0.0182865	0.0193699	0.0253236	0.0163677	0.0228525		0.000164872	0.000161113	0.000198443	0.000168893	0.000143115	0.000192441	0.000165803	0.000138675	0.000161026	0.000150755	0.000160659	0.000163498	0.000156622	0.000168357	0.00018087	0.0168637	0.0232976
Ethoxyacetic Acid		0.0448428	0.0397768	0.0776634	0.0777083	0.0105277	0.0269325	0.0666019	0.038989	0.0348072	0.0405362	0.027421	0.0726141	0.043657	0.0231313	0.022786	0.424873	0.032936	0.0629814	0.64337	0.265732	0.600106	0.206086	0.584253	0.253314	0.821994	0.464999	0.533434	0.769357	1.06241	0.390822		0.0205309	0.126749	0.0569767	0.0109986	0.0291917	0.0455152	0.0216989	0.0739303	0.0186747	0.0618823	0.0642439	0.0120129	1.61908	0.0276811	0.0187804	0.445249	0.775873
Ethylmalonic acid		0.00687125	0.00946375	0.00942165	0.00981308	0.00643525	0.0106445	0.00617065	0.0272745	0.0130158	0.00804827	0.0105546	0.00673347	0.00727807	0.00815	0.0132145	0.525609	0.690939	0.590221	0.621616	0.507881	1.0936	0.277348	2.02882	0.872408	0.572405	0.936396	0.492576	0.73264	0.543346	0.785641		0.0103551	0.00952257	0.00841055	0.00473156	0.0113665	0.0117559	0.00861041	0.00730644	0.00570979	0.00578917	0.00963248	0.0109925	0.0127683	0.0174655	0.00667737	0.718287	0.84915
Fumaric acid		0.0187355	0.0142979	0.0177296	0.0178829	0.0162691	0.0162951	0.0216201	0.0188416	0.0248468	0.0218067	0.0133839	0.0154385	0.0162131	0.016072	0.0135916	0.106005	0.0619961	0.130853	0.0710316	0.0992439	0.0758067	0.114901	0.0652863	0.11699	0.0802128	0.0619004	0.0971147	0.0458516	0.0451468	0.0568457		0.0147582	0.0183267	0.0142478	0.0165855	0.0172723	0.0155403	0.0168045	0.0158326	0.017416	0.0182795	0.0167633	0.0154004	0.0152866	0.0151224	0.0182598	0.0395271	0.0310249
Gentisic acid		0.00486578	0.00290701	0.00500048	0.00393926	0.00258581	0.00358837	0.00177918	0.00149662	0.00176123	0.00271707	0.00236563	0.00206747	0.00199196	0.00296336	0.00258255	0.323753	0.129256	0.305816	0.226492	0.0892512	0.216357	0.119996	0.0333966	0.0696872	0.125505	0.0805488	0.0596417	0.108909	0.168278	0.104412		0.00265995	0.00176141	0.00389839	0.001801	0.00392786	0.00184129	0.00301452	0.0028325	0.00182582	0.00287167	0.00318392	0.00548118	0.0022249	0.00464901	0.00145553	0.105222	0.0681089
Gluconic acid or gluconolactone		0.0652878	0.0569583	0.0621634	0.05673	0.0620598	0.0660502	0.0789676	0.060976	0.0717323	0.0548544	0.0582375	0.0700791	0.0601246	0.0656568	0.0740907	4.7045	2.96327	4.39825	4.02417	4.0756	5.07956	5.50791	3.72713	5.23355	4.4239	5.07819	5.0699	6.34173	4.96034	5.45591		0.0588929	0.0612281	0.0702549	0.0673407	0.0599815	0.071667	0.0494468	0.055318	0.0732635	0.060802	0.0623204	0.0632191	0.0632224	0.054233	0.0477616	3.46808	4.98632
Glucose 6-phosphate		0.000826339	0.000956696	0.000742358	0.000913131	0.000823582	0.000893341	0.000684965	0.00078251	0.000926415	0.000817031	0.000785796	0.000904974	0.00090572	0.00082247	0.000891065	0.00513993	0.0084548	0.0101669	0.0094454	0.0100341	0.00695233	0.0123368	0.0146705	0.00969708	0.00865799	0.0077948	0.00775887	0.00574705	0.0110077	0.0115305		0.000889248	0.00092816	0.000967745	0.000868797	0.000762271	0.000895507	0.000823131	0.000756626	0.000873335	0.000870599	0.000879126	0.00080918	0.00089228	0.000771382	0.000932378	0.0058171	0.0115632
Glucuronic acid		0.0288186	0.0481988	0.0214331	0.0252375	0.0214128	0.0366583	0.0219696	0.0285192	0.0220115	0.0243151	0.0233443	0.0204975	0.0209851	0.0304436	0.037385	2.9207	3.61839	2.3626	2.18692	2.32497	3.51827	2.55316	2.93936	2.59083	2.45782	2.57466	2.10811	2.04231	2.62286	3.99826		0.0268196	0.0214135	0.025302	0.0249206	0.0385926	0.0402662	0.023782	0.022944	0.0260539	0.0461087	0.041954	0.0242515	0.0306374	0.0272175	0.0224719	2.82305	3.01286
Glutaric acid or methylsuccinic acid		0.0618137	0.0348345	0.0634348	0.0416992	0.0314788	0.0572024	0.0459914	0.0525088	0.0382504	0.0536825	0.0552164	0.048204	0.0549584	0.0541708	0.0348712	0.508614	1.38485	0.685052	0.790495	0.516992	0.725568	1.23342	1.08809	0.569522	0.546649	0.827791	0.862283	0.593382	0.952853	0.627905		0.062867	0.0533857	0.034377	0.0357356	0.0290448	0.0423966	0.0530724	0.0484977	0.0552489	0.0336155	0.0316935	0.0277433	0.0333233	0.0613989	0.0597343	0.744029	0.463443
Glyceric acid		0.1274	0.0599961	0.111836	0.0793115	0.058947	0.099262	0.117183	0.121943	0.0650873	0.0910128	0.111605	0.0706008	0.146756	0.105938	0.0824141	0.255906	0.154794	0.160829	0.398016	0.0981967	0.171123	0.33261	0.169007	0.206074	0.228578	0.306964	0.154682	0.138273	0.437838	0.142282		0.107348	0.110232	0.0630212	0.0775685	0.0710973	0.0687088	0.100236	0.111822	0.120781	0.0856477	0.0600138	0.0775355	0.0906408	0.114617	0.105469	0.0890106	0.118477
Glycerol		0.0706109	0.00956998	0.0481274	0.00352413	0.00704507	0.0431331	0.0887064	0.0366203	0.0125607	0.0428261	0.0471051	0.0117392	0.103226	0.0397001	0.0136045	0.0396004	0.00790791	0.0344665	0.0100682	0.00813206	0.0711519	0.360733	0.00781832	0.0119101	0.00801564	0.422033	0.0887852	0.00736502	0.214055	0.0141905		0.0773067	0.039246	0.00396731	0.00502533	0.00308573	0.0177939	0.0859845	0.0583766	0.0563289	0.0049398	0.0114407	0.0047635	0.00518243	0.0466989	0.034351	0.00800388	0.00814842
Glycerol 3-phosphate		0.00365804	0.00745413	0.00360532	0.00586648	0.00654137	0.00605433	0.00304803	0.00391458	0.00476387	0.00457424	0.00769631	0.00584037	0.00424707	0.00733707	0.00394889	0.075495	0.35203	0.117195	0.167636	0.232079	0.0533416	0.0357289	0.0478166	0.0418241	0.0904524	0.19521	0.17996	0.0656061	0.0989447	0.0846463		0.00457641	0.0057462	0.00561579	0.00593324	0.0042726	0.0050278	0.00474745	0.00478492	0.00533806	0.00554346	0.00737343	0.00709285	0.00374534	0.00651974	0.00556189	0.151674	0.0402226
Hippuric acid		0.0410342	0.0223821	0.00768808	0.00652512	0.226737	0.140883	0.0339907	0.0704658	0.0157571	0.0440902	0.0692837	0.0960974	0.0122088	0.0106195	0.0289847	30.2402	9.80701	4.49256	3.67803	77.019	48.7804	22.132	25.6483	8.55789	31.8451	40.8316	34.7805	16.0539	9.02901	13.9505		0.0679465	0.010005	0.0206268	0.0202791	0.0683931	0.0486004	0.0196551	0.0213168	0.0133768	0.10687	0.0456365	0.0905316	0.00690911	0.0350375	0.00381265	32.5355	9.51388
Homotaurine		0.000912705	0.000786076	0.00226611	0.000959219	0.00113364	0.00112039	0.000973208	0.000897989	0.00134966	0.00114004	0.00106597	0.00113138	0.000865694	0.00109111	0.00124506	0.00582856	0.0478269	0.143254	0.00558152	0.0144298	0.00880926	0.0414471	0.00337855	0.0190694	0.0205403	0.0186553	0.0089758	0.00363231	0.00968457	0.016902		0.00217212	0.00103587	0.000927612	0.00118214	0.00097685	0.000954651	0.0010664	0.00112296	0.000968097	0.00108753	0.00102679	0.00103349	0.00082982	0.000944902	0.00135385	0.130596	0.0309068
Homovanillic acid sulfate		0.000230392	0.000247277	0.000229131	0.000239584	0.000217854	0.000225291	0.000187119	0.000177221	0.000294929	0.000232697	0.000211651	0.000604034	0.000223886	0.000237753	0.000284463	0.0464396	0.0496566	0.0673552	0.0508229	0.0216834	0.0348359	0.0316569	0.0396521	0.0489967	0.0564953	0.0281255	0.0398511	0.0344764	0.00494869	0.0312656		0.000215144	0.000212191	0.000235649	0.0004396	0.000209548	0.000242496	0.000221843	0.000215198	0.000225098	0.000204542	0.000165103	0.000239924	0.000258992	0.000212565	0.000232291	0.380564	0.0494977
Hydroxyphenyllactic acid		0.0106577	0.0240549	0.014621	0.0164946	0.0361734	0.0107244	0.017722	0.0155084	0.0162683	0.0154231	0.0177105	0.0133568	0.0213334	0.0127087	0.0188884	0.0402764	0.102425	0.0593834	0.0508267	0.067915	0.0515434	0.0302382	0.102451	0.104409	0.0491042	0.0302721	0.0540594	0.0599258	0.0306296	0.351403		0.0164389	0.0135044	0.0259311	0.0334092	0.0306994	0.0248563	0.0259833	0.0230404	0.0188884	0.02041	0.0206898	0.0158089	0.02215	0.0195022	0.0205786	0.0647025	0.0434101
Hydroxypropanedioic acid		0.0313669	0.0291807	0.0261471	0.0315368	0.0183735	0.0283551	0.0319578	0.0391229	0.0328511	0.0316927	0.0483758	0.0292107	0.0428138	0.0477544	0.0343586	0.109628	0.051347	0.09883	0.154183	0.0675279	0.0508132	0.131594	0.431709	0.076325	0.0851098	0.213636	0.0582657	0.0380241	0.300742	0.174332		0.0293678	0.0232818	0.0238177	0.0190502	0.0238389	0.0249631	0.0279002	0.0296971	0.0298469	0.0322754	0.0300533	0.0359031	0.0362432	0.0349071	0.0354876	0.190309	0.0514745
Indole-3-acetic acid		0.00528202	0.0273779	0.00881703	0.0107905	0.0119533	0.0130351	0.00643199	0.0105368	0.00853199	0.0129198	0.00754988	0.00764628	0.00830292	0.0136449	0.0430943	0.231217	0.524989	0.212016	0.366905	0.100774	0.393122	0.143071	0.369247	0.192123	0.271485	0.232759	0.0928256	0.213877	0.415681	0.707444		0.038802	0.0164821	0.0089527	0.00794587	0.0119188	0.010706	0.0103591	0.0104974	0.00746619	0.00952724	0.00936773	0.0112305	0.0118047	0.00928492	0.00929275	0.459947	0.574121
Indole-3-lactic acid		0.00483274	0.0134799	0.0111698	0.0101604	0.0155204	0.00939601	0.0101492	0.00569346	0.00806489	0.00676165	0.00827653	0.0113899	0.0072593	0.00898714	0.0115559	0.0122725	0.0277675	0.127351	0.0169139	0.00643044	0.0432076	0.0345001	0.0517061	0.0566642	0.00816223	0.00712261	0.0267586	0.0167354	0.00604268	0.155801		0.0149295	0.00872066	0.0202006	0.0246361	0.0160874	0.010603	0.011103	0.0102916	0.00928878	0.00776405	0.0140255	0.0112137	0.0144932	0.0129796	0.0104781	0.0205926	0.0102558
Indoleacetyl glutamine		0.000172925	0.000202782	0.000204963	0.000182006	0.000186324	0.000160826	0.00012259	0.000136984	0.000189844	0.000152862	0.000173888	0.000210567	0.000167771	0.000169171	0.000235345	0.0173167	0.0331595	0.0434571	0.00516515	0.0307117	0.0500749	0.0178555	0.030126	0.0319885	0.0460867	0.0324314	0.0136414	0.0346965	0.0969507	0.106394		0.000159511	0.000175035	0.000174098	0.00016149	0.000140944	0.000171101	0.000169335	0.000173918	0.000158215	0.000167872	0.000155374	0.000183442	0.000202149	0.000173011	0.000197722	0.0889955	0.0941233
Isethionic acid		0.0316349	0.036752	0.0306664	0.0295585	0.0200556	0.0245215	0.0346996	0.0253973	0.030838	0.0253908	0.027512	0.0353337	0.0284801	0.0270404	0.0327133	6.23504	4.70031	4.76106	4.32052	2.95606	3.91936	4.92493	4.05532	4.95967	5.10292	4.944	5.22096	6.0171	4.97071	5.75827		0.0255913	0.0310275	0.0371278	0.0381482	0.0402444	0.0334785	0.0271833	0.0318524	0.0282828	0.0382353	0.0374151	0.0327738	0.0449249	0.0353797	0.0444393	4.06695	6.85709
Isocitric acid		0.0294551	0.0167281	0.0196341	0.0151896	0.0196355	0.0187797	0.0273049	0.0232138	0.0294871	0.0162853	0.0224947	0.0181318	0.0236233	0.0146029	0.0134617	7.38146	5.98989	2.94419	2.33695	3.72373	4.57719	2.14587	2.64277	7.0231	5.40907	3.68027	7.64266	8.2005	4.14295	1.29274		0.0120777	0.0211617	0.0150664	0.0258214	0.0190169	0.0211021	0.0233876	0.0209798	0.0150624	0.0149069	0.0212676	0.0194721	0.0214213	0.0163525	0.0131703	4.05276	5.92615
Lactic acid		7.92757	6.63993	8.58094	7.11543	11.8857	11.8574	9.50198	9.04022	10.6225	9.03371	9.91856	9.74904	8.2165	7.29974	9.26082	0.440179	0.394284	0.0638234	0.0686191	0.0791241	0.681022	0.151849	0.726725	0.0282021	1.01953	0.281369	0.401126	0.808022	0.124087	0.0943234		8.265	10.3292	6.50388	10.6425	8.76311	8.71234	9.41071	10.7287	8.32467	10.1457	8.64453	8.45254	7.70461	7.69152	10.121	0.459669	0.450792
L-Tyrosine methyl ester 4-sulfate		0.000179287	0.000203578	0.000202286	0.000191796	0.000194967	0.000195661	0.000165416	0.000170477	0.000198334	0.000185561	0.000185732	0.00020606	0.000174681	0.000185823	0.000228861	0.0218417	0.018559	0.00632372	0.0217979	0.0220714	0.0131172	0.0118257	0.0155391	0.016066	0.019945	0.00886617	0.00337014	0.012596	0.00396015	0.0130842		0.000177334	0.000192466	0.000224664	0.000201383	0.000163451	0.000182175	0.000178029	0.000164162	0.00019605	0.000330454	0.000166194	0.000181302	0.000200188	0.00018807	0.000215535	0.0152956	0.0147864
Maleic acid		0.0350456	0.0125043	0.0356923	0.0122792	0.00832465	0.0188218	0.026052	0.0302359	0.0109429	0.0276812	0.0265629	0.0122644	0.0505247	0.0187023	0.0111768	0.0703927	0.0452021	0.181427	0.0828788	0.0969217	0.0698195	0.192909	0.0807924	0.0972153	0.0628644	0.230289	0.0899157	0.053077	0.149299	0.139908		0.0336126	0.0252995	0.010808	0.0141566	0.0103421	0.0139185	0.0253716	0.02304	0.0335154	0.0111337	0.00713072	0.00964865	0.0123243	0.0270408	0.0175603	0.0660893	0.0769773
Malic acid		0.143731	0.118649	0.156903	0.160066	0.151495	0.146986	0.164555	0.1536	0.229862	0.16933	0.139194	0.104065	0.177912	0.128782	0.138957	0.707873	0.416543	0.66342	0.505075	0.809103	0.584195	0.998137	0.377175	0.94163	0.584587	0.62865	0.619024	0.419454	0.78795	0.526143		0.121021	0.139501	0.145184	0.15658	0.143967	0.147012	0.159723	0.159161	0.130433	0.153839	0.177291	0.153698	0.141508	0.1608	0.13702	0.366559	0.237328
Mandelic acid		0.00379012	0.00153556	0.00186706	0.00122146	0.00399003	0.00214147	0.00145385	0.00163132	0.00163592	0.00217685	0.00197994	0.00150705	0.00117532	0.00186508	0.00228868	0.029613	0.0421903	0.0419005	0.0304692	0.0440878	0.03821	0.0295945	0.0139061	0.0226832	0.0233653	0.0228842	0.0267354	0.0325255	0.0273395	0.0487058		0.00228042	0.00240871	0.0015084	0.00162033	0.00210643	0.00167717	0.00184187	0.00169106	0.00229223	0.0025733	0.00108167	0.00141452	0.00180594	0.00412719	0.00136981	0.0572347	0.0381444
Mevalonic acid		0.0486671	0.00725156	0.00920842	0.00518201	0.0048822	0.0165028	0.0116714	0.0109501	0.00835417	0.00614689	0.0100232	0.00693265	0.0151792	0.00667294	0.00869043	6.71385	0.241632	0.333969	0.364823	0.327649	1.72742	0.847662	1.98439	0.313026	0.656971	0.44491	0.340887	1.76341	0.246896	0.392677		0.0158804	0.00884448	0.00842074	0.00603721	0.0057932	0.00818349	0.00751423	0.0119678	0.0100253	0.00780424	0.00486356	0.0077233	0.00579861	0.00979277	0.00694678	0.880415	0.214988
N-Acetylaspartylglutamic acid		0.000591383	0.000597408	0.000427321	0.000807418	0.000631281	0.000508989	0.000119769	0.000225853	0.000682103	0.000477972	0.000578784	0.00074621	0.000673323	0.000816767	0.000620988	0.0316969	0.0257351	0.0209903	0.0285671	0.0206723	0.0241542	0.034209	0.0360872	0.0356358	0.0353514	0.0329551	0.0327524	0.0555123	0.0241927	0.0140428		0.000195591	0.000356545	0.000166544	0.00012796	0.000341689	0.00068763	0.000159684	0.000137808	0.000633196	0.000196907	0.000249328	0.000754996	0.000653043	0.000682992	0.000558052	0.0240833	0.0308289
N-Acetyl-D-galactosamine 4-sulfate		0.00107526	0.00131845	0.00168882	0.00143328	0.00145716	0.0017925	0.00176885	0.00175472	0.00129773	0.00151383	0.00103816	0.00150869	0.00141162	0.00176131	0.00178831	0.176761	0.199831	0.199163	0.192741	0.167656	0.229234	0.201789	0.242707	0.192408	0.196651	0.177088	0.215037	0.272466	0.23777	0.279079		0.00152961	0.00174944	0.00194984	0.00228534	0.00150548	0.00160595	0.00143743	0.00141228	0.00166459	0.00166284	0.00154478	0.00149067	0.00172898	0.00112745	0.00126133	0.230596	0.329601
N-Acetyl-D-glucosaminitol		0.000295115	0.00083668	0.00105444	0.000514177	0.000876085	0.00058273	0.000561782	0.000779369	0.000525431	0.000502116	0.000614351	0.000995238	0.000314594	0.000404834	0.000704766	0.079281	0.0919709	0.115177	0.0727237	0.0895867	0.0834302	0.0735386	0.115375	0.0815681	0.0794959	0.0981431	0.139356	0.0819812	0.0881048	0.12074		0.000957341	0.0012446	0.000725581	0.00164634	0.000788922	0.00172144	0.000661686	0.000654202	0.000702337	0.00110338	0.000564019	0.000731709	0.000774345	0.00106755	0.000866384	0.102654	0.161055
N-Acetylgalactosamine 4,6-disulfate		0.000585768	0.00136691	0.000828699	0.000919962	0.000718184	0.000935796	0.000673576	0.000868531	0.00106398	0.000802408	0.00046564	0.000973234	0.000914829	0.000725375	0.00112872	0.0819189	0.0721511	0.0977677	0.062183	0.073925	0.0872322	0.0923906	0.0911192	0.0938753	0.0767187	0.0828308	0.050628	0.117905	0.114165	0.0921587		0.00110669	0.000905659	0.00134401	0.0011564	0.00129802	0.00116692	0.000989973	0.000957306	0.0010713	0.000960376	0.00114309	0.00114103	0.000834284	0.000703329	0.00127588	0.0889505	0.118864
N-Acetyl-L-2-aminoadipic acid		0.000483706	0.000809881	0.00048778	0.000403426	0.000379531	0.000555084	0.000594996	0.000676305	0.000338458	0.000576918	0.000447276	0.000682602	0.000655776	0.000589041	0.000621241	0.0442893	0.0449963	0.0380865	0.0431365	0.0443395	0.0626559	0.0285879	0.0439545	0.0339276	0.0539096	0.0331555	0.043839	0.0578911	0.0380905	0.065763		0.000316957	0.000353014	0.000503695	0.000473279	0.000503092	0.000532569	0.00066007	0.000532713	0.000566916	0.000520167	0.000456797	0.000548641	0.000484239	0.000444131	0.000415888	0.0368753	0.0592354
N-Acetyl-L-alanine		0.0255718	0.0403406	0.0343512	0.0576318	0.0271674	0.0435158	0.033619	0.0332682	0.0350948	0.0270279	0.033798	0.0376413	0.0305612	0.0330207	0.0348216	0.234178	0.250658	0.378803	0.449971	0.199062	0.303659	0.0882304	0.19967	0.269384	0.181942	0.153509	0.326864	0.16052	0.20373	0.283449		0.0417214	0.0320152	0.0511984	0.0354552	0.0471287	0.0395625	0.0376483	0.0404487	0.0409456	0.0304639	0.0471184	0.0330039	0.0399969	0.0377674	0.041854	0.177908	0.115711
N-Acetyl-L-asparagine		0.000516649	0.000760377	0.000801348	0.000595995	0.0010758	0.000685671	0.000458271	0.000442796	0.000578097	0.000568447	0.000670272	0.000427251	0.000534028	0.000671592	0.000493752	0.231703	0.219829	0.236086	0.320049	0.860134	0.212932	0.100695	0.243644	0.182919	0.221402	0.183756	0.107555	0.132452	0.261086	0.426722		0.000246789	0.000377708	0.000690021	0.000568447	0.000862053	0.00070756	0.0004401	0.000440512	0.0005894	0.00045649	0.000667253	0.000639962	0.000673203	0.000553834	0.000703174	0.0419888	0.109973
N-Acetyl-L-aspartic acid		0.00681257	0.00637739	0.00711882	0.00716023	0.00785428	0.00623184	0.00779891	0.00795451	0.0080482	0.00760923	0.00618587	0.00604222	0.00760746	0.00921143	0.00763532	1.22378	0.798655	0.919069	1.07145	1.00888	1.23101	1.08674	1.08613	1.23254	1.79295	0.863332	1.12165	1.35731	1.04072	0.770962		0.00493172	0.00554032	0.00583913	0.00704065	0.00490754	0.00623285	0.0051058	0.00504218	0.0062899	0.00738479	0.00569248	0.00697813	0.00687481	0.00580572	0.00732202	0.972804	0.949182
N-Acetyl-L-cysteine		0.000162495	0.000214406	0.00018139	0.000238148	0.00020854	0.000191496	0.000140069	0.000152514	0.000210806	0.000210107	0.000188773	0.000220737	0.000212246	0.000216939	0.000213741	0.406149	0.23086	0.316023	0.318312	0.452286	0.169994	0.138215	0.151662	0.111563	0.18913	0.094729	0.141794	0.162154	0.146942	0.169373		0.000196242	0.000194045	0.000210326	0.000180811	0.000170248	0.00020158	0.000166499	0.000164104	0.000175513	0.000182388	0.000225728	0.000289259	0.000357272	0.000288076	0.000188275	0.210041	0.183487
N-Acetyl-L-glutamic acid		0.00177811	0.00155436	0.00168075	0.00293728	0.00240904	0.00164567	0.00182362	0.00201664	0.00147729	0.00147336	0.001868	0.00121731	0.00198018	0.00157311	0.00183877	0.208454	0.179722	0.160918	0.401913	0.356922	0.247124	0.162564	0.246354	0.214298	0.215116	0.221053	0.156543	0.262395	0.197529	0.210273		0.0012381	0.0013181	0.00153817	0.00149223	0.0014148	0.00136829	0.00156409	0.00148353	0.00115937	0.00123105	0.00142165	0.00186347	0.00146437	0.00164224	0.00138266	0.148456	0.219587
N-Acetyl-L-glutamine		0.00115801	0.000635804	0.00060112	0.00130661	0.000694501	0.000400958	0.000732307	0.000761607	0.000626581	0.000389799	0.000893498	0.000249333	0.000458275	0.000708287	0.00039982	0.18583	0.130066	0.11944	0.243841	0.382145	0.119196	0.0678962	0.171616	0.139061	0.121809	0.142889	0.0750189	0.0978146	0.192288	0.253223		0.000626238	0.000425183	0.000870604	0.000597605	0.00093321	0.000840714	0.00084098	0.00108948	0.000616092	0.000809278	0.000674511	0.000686245	0.000492284	0.000599335	0.000979856	0.031888	0.0892319
N-Acetyl-L-glycine		0.0545945	0.120547	0.0238812	0.0237947	0.013994	0.0227866	0.0389015	0.0534132	0.0159471	0.0141038	0.0237577	0.0714638	0.0406994	0.0591026	0.030248	0.0621152	0.273141	0.0577854	0.111426	0.119403	0.0472667	0.047202	0.0497647	0.0901095	0.04832	0.0822673	0.0829382	0.0545713	0.067653	0.0638565		0.0206008	0.0452931	0.0401944	0.0533245	0.0448108	0.0340382	0.0416545	0.0620472	0.0221998	0.0232806	0.0280782	0.027496	0.0578971	0.0297386	0.0325287	0.0250376	0.0391944
N-Acetyl-L-methionine		0.000527991	0.00095708	0.000726899	0.00177006	0.00121201	0.000765202	0.000906708	0.000760385	0.00092122	0.000517141	0.000342605	0.000575515	0.000695229	0.000516793	0.000573221	0.00141381	0.00266769	0.00362173	0.00147761	0.00264457	0.00166165	0.00398576	0.00127317	0.00219469	0.00135362	0.0052735	0.00655288	0.00381953	0.00356304	0.00457001		0.000541913	0.000526805	0.000921369	0.000739295	0.00123138	0.000850317	0.00080036	0.000763288	0.000712534	0.000808838	0.000653138	0.000666351	0.000554218	0.00052812	0.000739652	0.00114035	0.00174335
N-Acetyl-L-threonine		0.0168878	0.0215604	0.0165332	0.0217286	0.0176861	0.0154804	0.0188149	0.0180577	0.019952	0.0161747	0.0191357	0.0176849	0.0165184	0.0179501	0.0191252	0.806863	1.12966	0.555188	0.881577	0.857139	0.529994	0.575411	0.605098	0.74962	0.505273	0.926338	0.742926	0.577094	0.613264	0.893005		0.018995	0.0166268	0.0259759	0.0179511	0.0239345	0.0214537	0.0175019	0.0225294	0.0193397	0.0263161	0.0209191	0.019161	0.0234265	0.0218785	0.0163555	0.335807	0.55628
N-Acetyl-L-tyrosine		0.000136889	0.000158735	0.000141028	0.000159251	0.000140943	0.000145001	0.000125393	0.000129712	0.000144507	0.000130516	0.000159364	0.000203902	0.000142358	0.000128875	0.000172851	0.00773148	0.0164477	0.00514119	0.00854425	0.0121957	0.00740465	0.00371496	0.0211504	0.00912452	0.0127691	0.00754788	0.00509475	0.00656161	0.00305911	0.0403741		0.000141559	0.000139686	0.00013637	0.000122821	0.000129059	0.000140509	0.000123854	0.000138882	0.000145482	0.000147917	0.000136522	0.000138037	0.000155418	0.000137296	0.000146994	0.00166955	0.00440046
N-Acetyl-L-valine		0.000751806	0.000692468	0.000780176	0.000917458	0.000992272	0.000918015	0.000879199	0.000735658	0.00103813	0.000901989	0.000828086	0.000882749	0.000765563	0.000897209	0.000957675	0.0648524	0.0810061	0.077893	0.106809	0.142218	0.0568015	0.0157556	0.0377201	0.0546398	0.0544945	0.0544233	0.05912	0.0538101	0.016821	0.118983		0.000787332	0.000838507	0.00212437	0.000917885	0.00115825	0.000852324	0.000837984	0.00086842	0.000773818	0.000950457	0.00172233	0.000823635	0.000784171	0.000726799	0.00104135	0.00367049	0.0650296
N-Acetylneuraminic acid		0.00300323	0.00371925	0.000731157	0.00732035	0.0199979	0.00744605	0.00121664	0.0744831	0.00463598	0.0007888	0.00436022	0.0486538	0.00415324	0.0703562	0.0693265	0.186629	0.227803	0.23552	0.227843	0.195301	0.229294	0.23987	0.219344	0.190919	0.20549	0.23132	0.264779	0.285756	0.213021	0.317748		0.00267754	0.00564179	0.00471925	0.0817301	0.00614399	0.0206402	0.00291968	0.0144241	0.00697421	0.00468994	0.00796324	0.00695397	0.0155447	0.00545508	0.0079234	0.295214	0.297955
N-carbamoylglutamic acid		0.000653472	0.000431718	0.000521403	0.000480483	0.000606227	0.000473827	0.000501284	0.000779554	0.000347169	0.000430001	0.000484763	0.000489644	0.000455245	0.000476136	0.000464755	0.0146887	0.0155012	0.018177	0.0184755	0.0249106	0.00971824	0.0203978	0.0250406	0.0140388	0.0203453	0.0190942	0.0328128	0.0168643	0.0155739	0.0166568		0.000927902	0.000489948	0.000468014	0.000242218	0.000530239	0.000243354	0.000412594	0.000932296	0.000327262	0.000722515	0.000530427	0.000588283	0.000318639	0.000421874	0.000274781	0.0391015	0.00778905
Neomenthol-glucuronide		0.000501615	0.000438181	0.000427163	0.000372899	0.000408932	0.000363712	0.000384176	0.000472071	0.000464146	0.000375897	0.000418066	0.000436816	0.000506978	0.000374491	0.000420215	0.0445455	0.00505634	0.0161816	0.0804248	0.228975	0.192068	0.260325	0.0204688	0.0210379	0.0413591	0.0362294	0.00909877	0.00847613	0.0751999	0.00800817		0.000433129	0.000379301	0.000320361	0.000391	0.000400872	0.000466855	0.000379768	0.000427376	0.00044732	0.00258077	0.000357111	0.000415497	0.000407156	0.000451383	0.000420993	0.169721	0.0274844
N-Phenylacetylglutamic acid		0.000139065	0.000159177	0.000167188	0.000145495	0.000144878	0.000156757	0.000127191	0.000125558	0.000158398	0.000150428	0.000153462	0.00019088	0.000165598	0.000158773	0.000162057	0.0236959	0.0550353	0.0102796	0.0090564	0.0453147	0.0345669	0.0377811	0.0297198	0.0333628	0.0537378	0.0110321	0.0168683	0.0675548	0.0430137	0.0114309		0.000144878	0.000161026	0.000153345	0.000149094	0.000138491	0.000156116	0.000145456	0.00015559	0.000165217	0.000147727	0.000161107	0.000138041	0.000144878	0.000141257	0.000138487	0.0115503	0.0486181
N-Tigloylglycine		0.000169984	0.000734417	0.000175452	0.000163999	0.000369909	0.00016906	0.000238271	0.000305206	0.000171122	0.000165988	0.000130135	0.000191031	0.000168524	0.00020137	0.000175979	0.163966	0.344101	0.0596576	0.077495	0.279655	0.0986906	0.208047	0.203724	0.0746126	0.0940243	0.131209	0.192997	0.210777	0.218458	0.167319		0.000267553	0.000159802	0.000155151	0.00017514	0.000233264	0.000167761	0.000146794	0.000139487	0.00015733	0.000141411	0.000198107	0.000173381	0.000153253	0.000171353	0.000169075	0.121978	0.228386
O-Acetylserine or N-acetyl serine		0.0153597	0.019911	0.0218178	0.0332942	0.0205889	0.0242274	0.0184241	0.0187316	0.0210568	0.0148848	0.0189325	0.019727	0.0175827	0.0165513	0.018472	0.0995166	0.183458	0.33949	0.32775	0.250461	0.50497	0.08303	0.081991	0.142735	0.106656	0.153938	0.329836	0.101408	0.187643	0.178735		0.0196729	0.0168689	0.025697	0.0214714	0.0251931	0.0229438	0.0187758	0.0230111	0.019089	0.0180752	0.0248364	0.0172843	0.0221009	0.018831	0.0176489	0.193994	0.0751186
Orotic acid		0.00191552	0.00128896	0.00217294	0.00156822	0.00190729	0.00183854	0.0014241	0.00165842	0.00149932	0.00135427	0.00178302	0.00212746	0.00156945	0.00192938	0.00140475	0.265981	0.128511	0.309157	0.223383	0.0878346	0.169036	0.0940341	0.193535	0.212724	0.212275	0.156648	0.12256	0.274999	0.254445	0.294119		0.001636	0.00185726	0.00171173	0.00268961	0.00148356	0.00120245	0.00151295	0.001589	0.00115489	0.00186094	0.0014208	0.00237159	0.00289654	0.00193475	0.00146209	0.189316	0.249996
Orotidine		0.000441406	0.000542668	0.00069104	0.000393493	0.000526568	0.000700308	0.000453983	0.000650277	0.000464312	0.00058069	0.000616737	0.000537939	0.000306795	0.000509483	0.000566051	0.0716114	0.0703948	0.0876198	0.0549208	0.0651577	0.0970317	0.0730567	0.103906	0.0833901	0.0714945	0.0837399	0.0673984	0.0994294	0.080141	0.0879347		0.000569606	0.000713698	0.000837832	0.000900271	0.000950333	0.000798566	0.000755805	0.000798095	0.000822426	0.00055637	0.000752274	0.000661336	0.00054586	0.000649455	0.000316201	0.0930097	0.127273
Oxalic acid		0.453716	0.347475	0.330297	0.402289	0.201863	0.3684	0.365384	0.421284	0.339207	0.350577	0.462703	0.315935	0.419236	0.456881	0.37143	2.01241	1.17555	1.44457	3.00286	1.06153	0.934217	2.16351	3.17204	1.19589	1.4576	2.35269	1.32117	1.57977	3.66256	1.80695		0.357921	0.30499	0.315066	0.230456	0.316949	0.285465	0.34484	0.340733	0.345981	0.362127	0.372638	0.361927	0.380965	0.420819	0.413417	1.58635	1.312
Pantothenic acid		0.00171466	0.00220238	0.000964253	0.00085273	0.000870466	0.000805324	0.00202932	0.00452473	0.000910695	0.00145633	0.00205476	0.00136004	0.000671586	0.0101579	0.00143059	0.130965	0.0931358	0.160624	0.0638149	0.0750331	0.0945035	0.161308	0.51456	0.17139	0.146515	0.133043	0.12404	0.1268	1.2982	0.0986145		0.00232692	0.00183794	0.00279772	0.00177832	0.00116533	0.00148753	0.00306715	0.00416024	0.00133224	0.00781056	0.00391529	0.00224485	0.00412288	0.00603339	0.00261499	0.178502	0.134624
p-Cresol		0.00014607	0.000529917	0.000521557	0.000637911	0.000364434	0.000152087	0.000322885	0.000615018	0.000449796	0.000278662	0.000144313	0.00020281	0.000308473	0.00061062	0.000210114	0.107498	0.132356	0.203831	0.158712	0.0860049	0.0900553	0.116551	0.255746	0.175259	0.124595	0.0809309	0.0633237	0.119775	0.136356	0.0839102		0.000407383	0.000148906	0.000266138	0.000213958	0.000411656	0.000412901	0.000182366	0.000190937	0.000147414	0.000271344	0.000630472	0.000216864	0.000146229	0.000159277	0.000162899	0.101147	0.0935706
Phenol		0.000339265	0.000160596	0.000391331	0.000302934	0.000891961	0.000153457	0.000129399	0.00129495	0.000328022	0.000349773	0.000232932	0.000398858	0.000166004	0.000208964	0.000494019	0.0449967	0.00335828	0.00383172	0.00462305	0.0158092	0.00297784	0.00352097	0.0458939	0.0136484	0.0166384	0.0145222	0.0148891	0.00284796	0.0270483	0.018978		0.00109607	0.000169599	0.000166894	0.000166057	0.000221717	0.000181289	0.000140224	0.000141056	0.000162873	0.00060521	0.000120716	0.000153767	0.000139729	0.000368486	0.000152554	0.00307904	0.0011452
Phenol glucuronide		0.000161439	0.000218683	0.000169271	0.000199758	0.000204388	0.000165772	0.000136458	0.0001682	0.000213871	0.000205276	0.000185014	0.000227182	0.00020802	0.000373546	0.000209485	0.0165826	0.213633	0.0275573	0.00357959	0.0334282	0.232309	0.0203235	0.0218747	0.0244878	0.0151656	0.0202598	0.0680001	0.209115	0.325532	0.019655		0.00017351	0.000199124	0.000206138	0.000166637	0.000181983	0.000197566	0.000192697	0.000180927	0.000157518	0.000178756	0.000210971	0.00020378	0.000184166	0.000179017	0.000203553	0.0342063	0.0514425
Phenylacetylglycine		0.000184266	0.000148273	0.000147519	0.000160456	0.000141785	0.00015505	0.000133794	0.000142647	0.000175243	0.000159381	0.000174672	0.000192151	0.00016915	0.000145799	0.000171652	0.0152651	0.0192131	0.00428582	0.00163845	0.0136847	0.00586867	0.00616547	0.00488124	0.00250675	0.00584429	0.00464067	0.00381739	0.011901	0.00706921	0.00446987		0.000185128	0.000173005	0.000147467	0.000175478	0.000145771	0.000171821	0.000165788	0.000169146	0.000156734	0.000161482	0.000162341	0.00015599	0.000180955	0.000170362	0.000180673	0.0104478	0.0068127
Phenylacetyl-L-glutamine		0.00810343	0.0266906	0.00404212	0.00488184	0.0251714	0.0117471	0.0180538	0.00925143	0.00998319	0.0202806	0.00483069	0.00790218	0.015405	0.0204472	0.00685117	4.82845	9.26994	2.33501	2.01471	7.6178	4.8278	7.9283	4.4843	6.77325	8.02635	2.71443	2.97411	10.0621	8.89016	3.5333		0.00341896	0.00985024	0.00621774	0.00378434	0.0226731	0.0220957	0.00847496	0.00782743	0.00236662	0.014222	0.0171495	0.00751633	0.00342136	0.010679	0.000942062	1.69351	7.20538
Phosphoric acid		0.00660859	0.00452066	0.00492464	0.00561081	0.0208887	0.0109157	0.00495847	0.00519191	0.120985	0.00434412	0.0267008	0.0127941	0.0108935	0.00646221	0.0192104	38.3723	49.7219	28.5452	21.2212	38.8496	27.3974	27.3113	21.1561	36.3328	52.8118	22.1586	42.1231	32.7576	50.7573	20.7003		0.002467	0.00944294	0.019039	0.00780444	0.00354035	0.00906476	0.00948387	0.0124552	0.00415712	0.0118813	0.00736858	0.0168082	0.00887027	0.00687138	0.00472509	40.7866	20.4614
Pimelic Acid		0.00864305	0.0037699	0.00809561	0.0056966	0.00484695	0.00595075	0.00799947	0.00712149	0.00607675	0.00814853	0.00776238	0.00625074	0.00921855	0.00686031	0.00619524	0.0697512	0.182308	0.0938008	0.114441	0.0999077	0.0595368	0.101894	0.0723383	0.0750708	0.137982	0.128103	0.0910734	0.0545758	0.128064	0.169758		0.00845901	0.00723695	0.00488673	0.00604865	0.00470963	0.00655832	0.00733284	0.00624129	0.00765	0.00444987	0.00352465	0.0045489	0.00532753	0.00850304	0.00766609	0.0620309	0.115353
Pseudouridine		0.0292733	0.0462701	0.0395722	0.0370472	0.0308858	0.0393331	0.0400951	0.0383756	0.0387162	0.0300675	0.0328356	0.0474775	0.0329503	0.0346444	0.0424689	2.60198	2.11412	3.47581	2.88267	2.85046	2.39598	3.33066	2.7447	3.14467	2.61302	3.8355	2.65642	1.9394	3.57299	4.36711		0.0347881	0.0359447	0.0466914	0.0461138	0.042657	0.0428623	0.0386731	0.0336065	0.0409348	0.0404925	0.0438994	0.0379329	0.0428224	0.0346913	0.0393567	2.28127	3.24679
Pyrogallol-1-O-sulphate		0.000177628	0.000219778	0.000184713	0.000613311	0.00016069	0.000185752	0.000154181	0.000191408	0.000219778	0.000187583	0.000203696	0.00025353	0.000197533	0.000188666	0.000238577	0.00983245	0.0591985	0.0876119	0.409538	0.0631535	0.00705799	0.0734858	0.0186811	0.0217939	0.00339444	0.00534003	0.0185599	0.0169032	0.00352364	0.00573462		0.000176591	0.000182796	0.000213767	0.000183988	0.000159641	0.000209197	0.000204852	0.000158248	0.000412377	0.000176833	0.000627212	0.000223521	0.000194327	0.000188764	0.000206432	0.054766	0.0241088
Pyroglutamic acid		0.349175	0.293608	0.316755	0.353095	0.317017	0.30378	0.335765	0.342524	0.294804	0.29585	0.33922	0.265272	0.23622	0.347266	0.325744	2.99391	2.47595	2.79233	2.85249	2.28226	2.68018	3.22653	2.78035	3.17674	2.85539	3.2302	2.91181	3.57111	3.1651	3.14965		0.32794	0.329135	0.389931	0.433627	0.329945	0.391154	0.361016	0.462929	0.394206	0.37996	0.33644	0.341459	0.360416	0.345738	0.379198	2.50781	3.74378
Pyruvic acid or ascorbic acid		0.532968	0.456333	0.174073	0.526473	0.114079	0.0512002	0.212436	0.118869	0.127416	0.0444708	0.104019	0.0982538	0.0228046	0.0690788	0.0441476	0.158103	0.0063893	0.00512932	0.00846577	0.0111489	0.0263046	0.0120908	0.884188	0.00512687	0.118412	0.00969891	0.00723048	0.00699603	0.0111314	0.0178566		0.35878	0.220724	0.244735	0.0594933	0.236682	0.0908959	0.073312	0.0298437	0.0535454	0.0101748	0.0543678	0.0464766	0.0144172	0.0296362	0.0487142	0.577231	0.0100554
Quinic acid		0.015621	0.0119628	0.028417	0.0269746	0.0860439	0.0481111	0.0397463	0.0538753	0.000347952	0.0181019	0.00843657	0.0735257	0.000605283	0.00175325	0.000721353	1.80685	0.774675	2.68587	2.47205	7.88809	4.50708	4.13567	5.35519	0.0334188	2.1574	0.717167	8.95116	0.0636496	0.0876627	0.0538769		0.13154	0.00076533	0.0194142	0.00894501	0.0177135	0.00230673	0.00271513	0.0025796	0.00798792	0.00472475	0.0321411	0.0462768	0.00191587	0.0033465	0.00150273	9.9868	0.0122117
Ribonolactone		0.0443662	0.00797961	0.0691108	0.0590778	0.0647749	0.0664291	0.0533552	0.0201188	0.0552312	0.00358545	0.0532765	0.0167731	0.0584798	0.0644605	0.0726812	1.99476	2.39194	3.33143	2.20015	2.59749	3.4531	2.82772	2.61607	2.61666	2.35838	3.34401	2.13505	2.73418	2.52842	3.26212		0.102436	0.0475562	0.062662	0.0489398	0.0621624	0.0528066	0.0635679	0.064279	0.0572122	0.0690918	0.0505798	0.0624647	0.045358	0.065554	0.0727272	3.75431	2.71968
Salicyluric acid		0.000200087	0.00023768	0.000220238	0.000230285	0.000209398	0.00165513	0.00158607	0.000199415	0.000249802	0.000221409	0.000203436	0.000268962	0.000215197	0.000228525	0.000248186	0.0624047	0.0474752	0.102625	0.0567934	0.0298599	1.10979	1.43727	0.12224	0.0493017	0.099621	0.0202285	0.0295471	0.121949	0.0146978	0.0948929		0.000230274	0.000218262	0.000226503	0.000208907	0.000216616	0.000233084	0.000213233	0.000252214	0.000189278	0.000260206	0.000178481	0.000321458	0.000239843	0.000208916	0.000199425	0.204814	0.0314869
Succinic acid		0.692312	0.384651	0.592834	0.398183	0.343937	0.486353	0.49398	0.540584	0.459092	0.584437	0.579161	0.435019	0.627508	0.503977	0.356507	4.64492	2.52142	3.03244	5.73567	2.6078	1.66334	5.03261	5.50574	2.66873	3.45251	4.87255	2.96455	2.32334	6.96567	2.49459		0.573697	0.582913	0.357882	0.390504	0.354876	0.47972	0.563888	0.682819	0.554561	0.384159	0.343508	0.405826	0.383331	0.60646	0.550909	2.45429	2.05925
Sulfoacetic acid		0.00960565	0.00678847	0.00856897	0.00565636	0.00351377	0.00734124	0.00729901	0.00874332	0.00614579	0.00945398	0.00818486	0.00703356	0.00755656	0.00795053	0.00541185	0.351464	0.361048	0.215494	0.210268	0.120641	0.253372	0.251498	0.32585	0.265267	0.329606	0.215635	0.359516	0.395622	0.27882	0.303419		0.00789098	0.00940672	0.00658816	0.00446413	0.00484395	0.00687004	0.00749663	0.0075225	0.00708393	0.0065853	0.00514897	0.00405149	0.00548377	0.00901978	0.00676762	0.248312	0.374996
Sulfuric acid		6.79979	7.39095	6.62999	7.20668	6.87308	7.26884	6.67072	6.32158	7.31943	7.36445	6.65469	7.13034	6.68565	7.34546	6.72547	64.1932	112.265	101.804	99.0284	91.0097	85.3048	90.334	73.6735	104.735	96.4464	73.8423	83.335	70.5572	88.4792	85.1417		7.84547	6.7492	7.1061	7.11981	6.21817	7.56266	6.65683	6.45926	6.72491	6.9021	5.33302	6.75744	7.15572	7.2067	7.37779	83.6973	120.05
Taurine		0.660794	0.571369	0.573122	0.554592	0.868735	1.00552	0.856529	0.553461	0.667939	0.821473	0.616801	0.621938	0.415594	0.501631	0.794438	5.47821	4.04052	8.5558	3.34081	2.98293	3.96347	2.99949	3.46497	7.39772	7.11658	6.87907	5.6221	5.39203	9.42962	7.24333		0.726076	0.70839	0.419349	1.21864	0.714154	0.525055	0.670602	0.588387	0.397013	0.620959	0.756852	0.525595	0.395256	0.432321	0.79078	2.89225	7.13774
Thiosulfate		0.0485956	0.0600246	0.049307	0.0819485	0.0679905	0.0450052	0.0673098	0.0706818	0.062804	0.056309	0.0503797	0.0642006	0.0534774	0.050342	0.0627446	0.107504	0.227593	0.0516007	0.0743204	0.0902846	0.173325	0.112233	0.119879	0.147411	0.227563	0.0570649	0.0630481	0.238639	0.0811836	0.0670238		0.066903	0.0594863	0.0712309	0.0703526	0.0752425	0.059913	0.0512724	0.0546203	0.0576192	0.0832972	0.0592106	0.0483694	0.0373709	0.0416072	0.0519389	0.142289	0.220776
Threonic acid		0.694319	0.869949	0.586211	0.816092	0.417704	0.646053	0.77697	0.698898	0.67828	0.535469	0.870267	0.670024	0.550528	0.789322	0.807634	15.2669	10.6642	12.3653	13.7339	10.8101	14.3952	12.4801	13.0041	12.8185	12.4996	16.6742	12.7493	12.4303	16.2372	17.2596		0.688304	0.660064	0.85097	0.521659	0.72084	0.577859	0.649827	0.651477	0.622966	0.894739	0.66916	0.837987	0.629192	0.744242	0.749918	14.3623	15.1171
trans-Aconitic acid		0.00126402	0.00134837	0.00138261	0.00127718	0.0014999	0.000975701	0.00122945	0.00125757	0.0013907	0.00144077	0.000913861	0.00127289	0.00148507	0.0011918	0.00109958	0.555611	0.783747	0.46515	0.347905	0.463496	0.540085	0.434325	0.468169	0.664779	0.608799	0.505715	0.63119	0.848807	0.306087	0.45966		0.00107054	0.00128233	0.00178811	0.00190716	0.00200652	0.00135733	0.00178007	0.00197402	0.00158408	0.00167664	0.00193474	0.00162617	0.00170223	0.00116228	0.00122976	0.676044	0.665671
Uracil		0.000352115	0.00093708	0.000440475	0.000373061	0.000460062	0.000340801	0.000310752	0.000489587	0.000733184	0.000544143	0.000502458	0.000448048	0.000518818	0.000478676	0.000440633	0.2609	0.554184	0.475971	0.330918	0.392095	0.149306	0.216535	0.324789	0.353232	0.467183	0.40362	0.248055	0.334215	0.52499	0.424461		0.000422816	0.000454963	0.000566669	0.000279885	0.000309701	0.000652352	0.000292774	0.000470825	0.000558344	0.000461539	0.000650068	0.000442075	0.000565225	0.000373189	0.000325947	0.401739	0.655296
Ureidosuccinic acid		0.00199737	0.00102325	0.00126635	0.00330541	0.000506814	0.000977105	0.000591013	0.00962501	0.00311824	0.000504096	0.0013406	0.000779567	0.0015639	0.00162358	0.00081487	0.0209889	0.0247102	0.0667039	0.0465484	0.044364	0.0224077	0.0884441	0.0859173	0.0580527	0.0801554	0.0561702	0.0158531	0.0535543	0.015198	0.0182949		0.000705633	0.00133351	0.000853908	0.00375061	0.00332668	0.000360517	0.00149916	0.00165539	0.00952753	0.00083226	0.000731325	0.00321667	0.00446059	0.000294381	0.000755722	0.0621738	0.0310742
Uric acid		2.10971	3.0576	2.4193	2.71	2.59248	2.68201	2.49682	2.40482	2.30908	2.8368	3.10715	3.21968	2.39515	2.24596	2.99229	13.4403	5.50915	32.8338	15.4	20.5206	8.17613	29.4576	12.7151	19.5505	10.4333	36.813	11.6857	6.77389	39.931	31.1646		2.89719	2.69174	3.47611	2.84462	3.2658	3.12711	2.76326	2.67944	3.19686	2.75879	2.9089	3.18664	3.98083	3.12715	3.48562	7.76527	13.0717
Uridine		0.00194248	0.0047902	0.00273064	0.00262243	0.00126327	0.0022759	0.00276791	0.00311918	0.00368862	0.0028249	0.0032417	0.00301669	0.0034953	0.001761	0.00247302	0.0368764	0.0358217	0.0421436	0.0315486	0.0245003	0.04172	0.0441263	0.0398616	0.0421262	0.0366137	0.0385451	0.0318216	0.0485288	0.0343307	0.0371972		0.00237842	0.00312812	0.00424632	0.00260818	0.00309975	0.0023688	0.00276914	0.00224583	0.00295302	0.00354385	0.00336465	0.00319376	0.00368008	0.0024995	0.0029043	0.0349067	0.0496212
Vanilloylglycine		0.000155985	0.000175717	0.000140551	0.00017711	0.000184553	0.000133875	0.000132596	0.000122641	0.000161191	0.000142379	0.000154109	0.000169643	0.000155869	0.000166111	0.000212745	0.0160878	0.0161289	0.0504152	0.0199605	0.0318977	0.0825408	0.040933	0.0649355	0.00781758	0.0227083	0.00944705	0.0183958	0.0341161	0.00575149	0.0347295		0.000144529	0.000164152	0.000155969	0.000155173	0.000148778	0.000146351	0.000147594	0.000173248	0.00015742	0.000149037	0.000135759	0.000143465	0.000161435	0.000164241	0.000154215	0.118115	0.016776
Vanillylmandelic acid		0.000129554	0.000138728	0.000158879	0.00049862	0.000127052	0.000134878	0.000268792	0.000263545	0.000133715	0.000147229	0.000132611	0.000161317	0.000233478	0.000137097	0.000171754	0.317534	0.208802	0.426757	0.23494	0.248285	0.377666	0.378056	0.348479	0.33885	0.328826	0.369084	0.241431	0.394443	0.255009	0.469295		0.000131625	0.000218968	0.000371077	0.000270371	0.000256909	0.000460341	0.000385161	0.000321706	0.000221904	0.000126705	0.000163333	0.000207337	0.000135656	0.000144525	0.000183564	0.315982	0.489279
Xylulosonic acid		0.012705	0.0045068	0.00890214	0.00789738	0.00463774	0.00877977	0.00989993	0.0121139	0.0050847	0.00939559	0.011416	0.00659105	0.0138269	0.0115213	0.00787671	0.121559	0.120082	0.0726352	0.121457	0.0758122	0.189003	0.0991138	0.101006	0.0829391	0.103764	0.101371	0.090266	0.143057	0.124947	0.107166		0.00914666	0.0084022	0.00392389	0.00493897	0.00429517	0.00667235	0.0082999	0.0104639	0.00991577	0.00631321	0.0037635	0.00504339	0.00624466	0.0118201	0.00770153	0.180936	0.094829
α-Ketoadipic acid		0.00142612	0.00162137	0.0018941	0.00203436	0.00131844	0.00107474	0.00199593	0.000978301	0.00135492	0.0010566	0.000854009	0.00147594	0.00102641	0.00167405	0.00119572	0.13182	0.0385636	0.177378	0.0397466	0.179192	0.154842	0.358009	0.0274044	0.251168	0.109038	0.214462	0.229252	0.141047	0.0799221	0.0567864		0.00127808	0.00110809	0.00134555	0.0010473	0.00119699	0.000869343	0.00134181	0.0019794	0.00129188	0.00164958	0.00105333	0.0011188	0.0014261	0.00114543	0.0016251	0.151125	0.0651747
β-Citryl-L-glutamic acid		0.000620286	0.000341174	0.000389405	0.000343724	0.000463526	0.000465924	0.000519463	0.000416842	0.000291274	0.000320843	0.000267624	0.000308512	0.000448815	0.000296075	0.000587434	0.480029	0.286209	0.207311	0.310114	0.210353	0.498351	0.140849	0.165999	0.422356	0.285313	0.167096	0.232671	0.371949	0.290035	0.0379619		0.000362667	0.000576527	0.000288786	0.000303741	0.000760092	0.000321424	0.000698227	0.000551083	0.000484057	0.000294847	0.000499655	0.000299943	0.000496562	0.000297654	0.000293362	0.382009	0.47231
γ-Carboxyglutamic acid		0.000454315	0.000423513	0.000381213	0.00043372	0.000327309	0.000352987	0.00051632	0.000511996	0.000678969	0.000437527	0.000397257	0.000211297	0.000521528	0.000579091	0.000349215	0.236335	0.194701	0.122621	0.157258	0.0891132	0.267704	0.100635	0.0675076	0.218123	0.218407	0.125806	0.218096	0.297728	0.206192	0.0629983		0.00034803	0.000502504	0.000499319	0.000512368	0.000488432	0.000401033	0.000402056	0.00044086	0.000526669	0.000497697	0.000351949	0.000380031	0.000511186	0.000501374	0.000404824	0.196625	0.188443
γ-Glutamyl asparagine		0.000309751	0.000623933	0.000617036	0.000539948	0.000832384	0.000469203	0.000590702	0.000532245	0.00037725	0.000491721	0.000546643	0.000493445	0.000487141	0.000645752	0.000608239	0.0114785	0.0206099	0.0123874	0.0159364	0.0193215	0.0158956	0.014932	0.0231881	0.0172511	0.0230322	0.00765684	0.0158954	0.0139537	0.0120642	0.0135506		0.000464599	0.00057431	0.000842339	0.000823375	0.000615372	0.00047184	0.000581842	0.000562062	0.000588163	0.000621603	0.000619249	0.000676681	0.000758134	0.000567529	0.000736618	0.0211285	0.0150544
γ-Glutamyl aspartic acid		0.000283432	0.000289421	0.000335944	0.000298315	0.000305393	0.000266249	0.000215251	0.000217829	0.000311162	0.000280413	0.000296165	0.000345128	0.000274984	0.000277278	0.000385741	0.03561	0.034693	0.0211363	0.0175464	0.0262997	0.0404828	0.0125495	0.0364386	0.0350066	0.0305044	0.0130892	0.0325165	0.0399057	0.0052503	0.0108679		0.000261445	0.00028689	0.000276453	0.000264689	0.000231013	0.000282429	0.000277547	0.000285059	0.000259321	0.000283914	0.000297852	0.000276121	0.000331332	0.000291606	0.000488342	0.00286554	0.0422257
γ-Glutamyl glutamine		0.0224193	0.0213477	0.0229055	0.0232326	0.0222319	0.0134093	0.0201805	0.0242091	0.0178436	0.0228668	0.02077	0.0146393	0.0185199	0.0228345	0.0178962	0.00189264	0.00143989	0.00438569	0.00148636	0.00238743	0.000856742	0.0042671	0.00131905	0.00253816	0.00123377	0.00450299	0.00189914	0.000795553	0.00390705	0.00506599		0.020564	0.0222505	0.031388	0.0298151	0.0227799	0.0231055	0.027848	0.0284172	0.0230892	0.0269937	0.0235384	0.0262389	0.0267661	0.0279183	0.0242775	0.000915517	0.00125025
γ-Glutamyl glycine		0.000226255	0.000251589	0.000204055	0.000249651	0.000211771	0.000227542	0.000179944	0.000188398	0.000248338	0.000214109	0.00024329	0.000280356	0.000276974	0.00019718	0.000284483	0.00193528	0.026219	0.0243149	0.00181194	0.0353581	0.00405894	0.0283993	0.00131326	0.00416474	0.0374888	0.0192587	0.0300226	0.00168805	0.0132962	0.0189066		0.000234309	0.00026927	0.000238136	0.000223061	0.000195096	0.000208256	0.0002501	0.000199952	0.000202729	0.000211627	0.000193861	0.000217642	0.000248615	0.000207764	0.000257497	0.00110818	0.0110464
γ-Glutamyl valine		0.000166001	0.000183783	0.0001587	0.000177331	0.000177612	0.000172484	0.000133202	0.000149842	0.00019736	0.000182198	0.000177648	0.000203973	0.000187206	0.000170006	0.000205147	0.00471796	0.00857206	0.0142834	0.00554273	0.0149797	0.00446409	0.0077175	0.00376962	0.00760049	0.00853541	0.0081723	0.0126551	0.00482598	0.00822941	0.0133587		0.000147119	0.000159684	0.000205318	0.000165257	0.00014378	0.000172759	0.000171299	0.000160628	0.000163028	0.000162133	0.00014999	0.000173354	0.000170389	0.00016196	0.000173795	0.00579901	0.00406789
[truncated: 13 more columns]

## Sheet: Table S5
Table S5. List of serum and urine abundant polar metabolites
Compound's name	Normalized relative peak area in serum			Normalized relative peak area in urine			Fold median differences (urine/serum)
	Median	25th percentile	75th percentile	Median	25th percentile	75th percentile
Polar metabolites abundant in serum
4-Hydroxybutyric acid	0.493727	0.421662	0.681278	0.0464964	0.0356843	0.0596047	0.0941742
Aspartic acid	0.116302	0.102333	0.143827	0.018575	0.0118848	0.0236353	0.159714
Lactic acid	8.89841	8.22863	10.0704	0.312147	0.0977908	0.45745	0.035079
γ-Glutamyl glutamine	0.0228862	0.0209144	0.0257485	0.00189589	0.00126177	0.00374087	0.0828399
Polar metabolites abundant in urine
1-Deoxy-D-glucitol	0.00541464	0.00132135	0.0130149	0.296828	0.26846	0.355445	54.8195
2,3-Pyridinedicarboxylic acid	0.00455365	0.00405638	0.00549191	0.433813	0.345954	0.541782	95.2669
2-Deoxyribose	0.0165585	0.0145379	0.0187483	0.788686	0.658006	1.08849	47.6302
2-Hydroxyglutaric acid	0.0541673	0.0466682	0.0618395	2.24977	1.97398	2.55548	41.5337
2-Pyrroloylglycine	0.000159359	0.000146932	0.000182544	0.0720547	0.0566835	0.0886436	452.153
3,4-Dihydroxyphenylglycol O-sulfate	0.000559707	0.000351956	0.000666795	0.0710539	0.0630234	0.0869614	126.948
3-Dehydro-L-threonate	0.00118545	0.00100509	0.00152266	0.10515	0.0804205	0.12017	88.7008
3-Hydroxy-3-methylglutaric acid	0.0200686	0.00915727	0.0257157	0.97377	0.939564	1.05276	48.5221
3-Methoxy-4-hydroxyphenylethyleneglycol sulfate	0.000323142	0.000240753	0.000426962	0.152661	0.130312	0.164814	472.426
3-Methylglutaric acid or adipic acid	0.0509247	0.0454236	0.055819	0.522487	0.426557	0.716136	10.26
3-Sulfonatolactate	0.00113173	0.00069982	0.00135246	0.137675	0.0909272	0.185273	121.65
4-Acetamidobutanoic acid	0.00224596	0.0017633	0.00241569	0.645992	0.55564	0.735693	287.624
5-Hydroxyindole-3-acetic acid	0.00019765	0.000184781	0.000209082	0.0576421	0.0524228	0.0650843	291.638
Acetylcysteine	0.000198911	0.000180956	0.00021424	0.185592	0.144711	0.301462	933.04
Ascorbic acid-2-sulfate	0.00437693	0.00372158	0.00528468	0.441675	0.379499	0.529294	100.91
Aspartylaspartic acid	0.000217702	0.000204345	0.000232717	0.0315988	0.0244382	0.0383575	145.147
Aspartylserine or serylaspartic acid	0.000174617	0.000164	0.000186273	0.0312315	0.0281082	0.035794	178.857
cis-Aconitic acid	0.0153917	0.013633	0.0175107	6.27189	5.4728	7.3047	407.486
Cyclic AMP	0.000164303	0.000157588	0.000180071	0.0209041	0.0180246	0.0231563	127.229
Glucose 6-phosphate	0.000871967	0.000811143	0.000902608	0.00932418	0.00776785	0.0113998	10.6933
Gluconic acid or gluconolactone	0.0621116	0.0584013	0.0670181	4.48545	3.91132	5.07612	72.216
Glucuronic acid	0.0252697	0.0225899	0.0305889	2.63761	2.48166	2.91812	104.378
Glutaric acid or methylsuccinic acid	0.0483509	0.0348437	0.0551519	0.699328	0.552368	0.833322	14.4636
Isethionic acid	0.0317436	0.0277047	0.036409	4.96519	4.6205	5.63154	156.415
Isocitric acid	0.0195531	0.0154636	0.0222264	4.21825	3.02304	5.61289	215.734
Mandelic acid	0.0018239	0.00151519	0.00225453	0.0328772	0.0268864	0.0416662	18.0257
N-Acetylaspartic acid	0.000568418	0.000231721	0.000668253	0.0271054	0.0207518	0.0329044	47.6856
N-Acetylaspartylglutamic acid	0.000568418	0.000231721	0.000668253	0.0271054	0.0207518	0.0329044	47.6856
N-Acetyl-D-galactosamine 4-sulfate	0.000159359	0.000146932	0.000182544	0.0720547	0.0566835	0.0886436	452.153
N-Acetyl-D-glucosaminitol	0.000728645	0.000568696	0.000937027	0.097448	0.0834666	0.121531	133.739
N-Acetylgalactosamine 4,6-disulfate	0.00152172	0.00141753	0.00174433	0.21607	0.193718	0.242274	141.991
N-Acetylglutamic acid	0.00154627	0.00141651	0.00181225	0.193135	0.159325	0.218469	124.904
N-Acetyl-L-2-aminoadipic acid	0.000511931	0.000449656	0.00058601	0.043893	0.036969	0.0527913	85.7401
N-Acetyl-L-alanine	0.0365482	0.0330826	0.0408214	0.214611	0.192433	0.269785	5.872
N-Acetyl-L-glutamine	0.000680378	0.000598038	0.000840914	0.129083	0.1145	0.174082	189.723
N-Acetyl-L-threonine	0.0190601	0.0175477	0.0215337	0.658924	0.560071	0.803849	34.5708
N-Acetylneuraminic acid	0.00654898	0.00420499	0.0152646	0.232177	0.219789	0.264483	35.4524
N-Acetylvaline	0.000873809	0.000784961	0.000942347	0.0642078	0.0539634	0.0761653	73.4804
N-Carbamoylglutamic Acid	0.00047831	0.000423905	0.00053038	0.0181238	0.0154	0.0215559	37.8914
N-Tigloylglycine	0.000170553	0.000160852	0.000196338	0.167512	0.104512	0.206966	982.173
Orotidine	0.000598714	0.000529411	0.00074263	0.0888716	0.0736214	0.099157	148.438
Oxalic acid	0.359924	0.332524	0.396958	1.58306	1.31173	1.98914	4.39833
p-Cresol	0.000268741	0.000167766	0.00041259	0.0948968	0.0841334	0.130416	353.116
Phenylacetyl-L-glutamine	0.00886319	0.00521582	0.0167133	4.82812	2.89379	7.24017	544.738
Phosphoric acid	0.00833736	0.00501683	0.0123117	31.5064	21.3508	41.7889	3778.95
Pimelic Acid	0.00640453	0.0054198	0.00773831	0.0956821	0.063961	0.125969	14.9398
Pseudouridine	0.0390246	0.0347155	0.04261	3.17976	2.62387	3.50099	81.4809
Pyroglutamic acid	0.340339	0.319199	0.360866	3.15737	2.85321	3.40554	9.27714
Ribonolactone	0.0587788	0.0493498	0.0646963	2.72693	2.49079	3.31411	46.3931
Sulfoacetic acid	0.490166	0.386114	0.577795	2.59845	2.23996	4.34682	5.30116
Sulfuric acid	6.88759	6.67445	7.2533	90.1378	84.0007	104.536	13.087
Taurine	0.621448	0.532561	0.749158	5.55015	3.79006	7.35912	8.931
Threonic acid	0.683292	0.633407	0.786234	14.1161	12.562	15.7037	20.6589
trans-Aconitic acid	0.00136997	0.00123671	0.00166402	0.591206	0.465905	0.665448	431.547
Uracil	0.000457513	0.000373093	0.000537812	0.396917	0.324939	0.473774	867.553
Uridine	0.0028646	0.00247964	0.00322972	0.0398143	0.0360197	0.0437005	13.8987
Vanillylmandelic acid	0.000167543	0.000136017	0.000261886	0.336042	0.281698	0.391582	2005.7
Xylulosonic acid	0.00809864	0.00537469	0.00991181	0.103989	0.0948319	0.1265	12.8403
γ-Carboxyglutamic acid	0.000439194	0.000385224	0.000509016	0.178627	0.108889	0.218336	406.716
γ-Gllutamyl valine	0.000170844	0.000160961	0.000177639	0.00855374	0.00500517	0.0126356	50.0676
γ-Glutamyl asparagine	0.000585002	0.000503145	0.000623351	0.0165938	0.0140046	0.0218925	28.3653
γ-Glutamyl aspartic acid	0.000283673	0.000275268	0.0002982	0.0271416	0.0192253	0.0357526	95.6794
